# Supplementary material for: Stromal cells engineered to express T cell factors induce robust CLL cell proliferation in vitro and in PDX co-transplantations allowing the identification of RAF inhibitors as anti-proliferative drugs
Source: PubMed Central journal article supplement (PMC11286525; doi:10.1038/s41375-024-02284-w), 2024-06-14
Supplement: 41375_2024_2284_MOESM1_ESM.pdf [file 41375_2024_2284_MOESM1_ESM.pdf]

## **Supplemental Materials**

*Hoferkova et al.*

### Correspondence:

Marek Mraz, M.D., Ph.D.  
Professor of Oncology  
Central European Institute of Technology, Masaryk University  
Kamenice 5, 625 00 Brno, Czech Republic  
E-mail: marek.mraz@email.cz  
Tel.: +420 549498143

### **1) Supplemental Methods**

### **2) Supplemental Figures:4**

### **3) Supplemental Tables: 18**

#### **1) Supplemental Methods**

##### **Engineering of the HS5 cells with T-cell factors**

The coding sequence (CDS) for human IL4 and puromycin resistance cloned into the pAIP lentiviral vector was a gift from Dr. Jeremy Luban, USA (Addgene plasmid #74169). CDS for human CD40L and blasticidin resistance cloned into the pEZ-Lv197 lentiviral vector was obtained from Genecopoeia (EX-G0117-Lv197). CDS for human IL21 cloned in the pBMN-IRES-LyT2 retroviral vector was a kind gift from Dr. D. Hodson (University of Cambridge) and was propagated in Stbl3 *E.coli* (Invitrogen). For transduction of HS5 cells, viral packaging plasmids  $\delta$ R8.91 or gag-pol, VSV-G and L-GFP (a kind gift of Dr. M. Smida, Masaryk University) were used as follows: 3538 ng  $\delta$ R8.91 or gag-pol, 462 ng VSV-G (envelope), 400 ng L-GFP and 2  $\mu$ g of a CDS construct used to transfect HEK-293T cells (semi confluent 6 cm<sup>2</sup> plate), after mixing with 50  $\mu$ l of Opti-MEM medium (Gibco), 7  $\mu$ l of DharmaFect Duo (Dharmacon) and 2 ml of DMEM (Biosera). After 24 h, cells were washed with fresh DMEM medium. The virus supernatant was collected after 24, 36, 48 and 60 hrs and the media filtered through a 0,45  $\mu$ m filter, mixed with 10  $\mu$ g/ml of polybrene (Sigma Aldrich) was placed directly on HS5 cells seeded in two 6 cm<sup>2</sup> Petri dishes (TPP). The medium was replaced the next day and selection with 10  $\mu$ g/ml puromycin (Sigma Aldrich) or 10  $\mu$ g/ml blasticidin (Gibco) started 1 to 2 days later and lasted up to 1 week. Cells were maintained at 37 °C with 5 % CO<sub>2</sub> in DMEM medium with 10 % heat-inactivated FBS without other antibiotics. Cell lines expressing CD40L were further FACS sorted to select a population of 10 % cells with the highest expression of CD40L.

##### **Preparation of conditioned media**

To prepare conditioned medium, HS5 cells were seeded in a 10 cm TPP Petri dish in 15 ml of DMEM medium, and 2 to 3 days later, the media was collected, separated from the cell debris by 10 min

centrifugation at 1000 G, and diluted with fresh RPMI media containing 10 % FBS and antibiotics at the final concentration of 50 % conditioned media. The medium was immediately used for experiments with CLL cells.

### **Gene expression of CXCR4/CD5 subpopulations**

For RNAseq analysis, freshly isolated CLL cells were sorted according to CXCR4/CD5 expression (purity 99,9 %), as previously described [1]. Total RNA was isolated by TRI Reagent (Molecular Research Center) as described previously [2]. Libraries were prepared using the TruSeq Stranded messenger RNA LT Sample Prep Kit (Illumina) and sequenced with the NextSeq 500/550 High Output v2.5 Kit. DESeq2 normalised counts were used for all visualisations. Heatmap visualisations were done in heatmapr.ca tool. Tables of potential upstream regulatory cytokines were generated using Ingenuity Pathway Analysis QIAGEN tool [3].

### **Gene expression analysis in co-cultured CLL cells**

Primary CLL cells were cultured for three days on plastic (gelatine coated) or co-cultured with HS5-WT, HS5-CD40L-IL4 or HS5-CD40L-IL4-IL21 cells (without and with RAF inhibitors in some experiments) and cells negative for CD105 (HS5 cells marker) were sorted (purity >99 % of CLL cells) and RNA isolated by TRI Reagent (Molecular Research Centre) as described previously [2]. Total RNA (300 ng) was used as an input for library preparation using QuantSeq 3'mRNA-Seq FWD with UDI 12 nt Kit (v.2) (Lexogen) in combination with UMI Second Strand Synthesis Module for QuantSeq FWD. Quality control for library quantity and size distribution was done using QuantiFluor dsDNA System (Promega) and High Sensitivity NGS Fragment Analysis Kit (Agilent Technologies). Final library pool was sequenced on NextSeq 500 (Illumina) using High Output Kit v2.5, 75 cycles in single-end mode (average of 17 million reads per sample). Expression signatures for lymph node CLL cells (BCR, MYC, NFκB, E2F) were adopted from Herishanu *et al.*, 2011 [4], and heatmaps were generated with www.heatmapr.ca tool. Signalling pathway analysis was performed using KEGG mapper. Tables of potential upstream regulatory cytokines were generated using Ingenuity Pathway Analysis QIAGEN tool [3].

### **CLL samples**

Primary CLL samples were collected in accordance with the Declaration of Helsinki with written informed consent and the Institutional Ethical Review Board approved the study (Masaryk University, No. EKV-2022-068). Peripheral blood samples were obtained from patients diagnosed with chronic lymphocytic leukemia, who did not receive any therapy for at least six months and had a WBC count  $>40 \times 10^9/l$ . All primary CLL samples were purified by negative selection with the RosetteSep Human B Cell Enrichment Cocktail (Stemcell Technologies) and the RosetteSep Human CD3 Depletion Cocktail (Stemcell Technologies) and Ficoll-Paque PLUS (GE Healthcare) according to the manufacturer's

protocol and the final purity was >98 % of CD5<sup>+</sup>19<sup>+</sup> cells. In experiments using B cells from healthy donors, the samples were prepared using RosseteSep separated buffy coats treated with “In Vivo Ready Anti-Human CD3 antibody” (Tonbo, 1 µg/10<sup>6</sup> cells) immediately before transplantation to completely deplete autologous T cells. Purified primary CLL cells were either directly cultured in RPMI 1640 (Biosera) with 10 % heat-inactivated FBS (Biosera) and 100 U/ml penicilin / 100 µg/ml streptomycin (Sigma Aldrich) at 5 % CO<sub>2</sub> and 37 °C or frozen in FBS with 10 % DMSO in liquid nitrogen for later use.

### **Cell proliferation assay (CFSE/FarRed) in co-cultures**

Purified CLL cells were loaded with cell trace dye (CFSE or Far Red Dye, Invitrogen) according to the modified manufacturer's protocol [5]. Briefly, up to 5×10<sup>7</sup> CLL cells were resuspended in 400 µl of PBS in a 1.5 ml tube. CLL cells were stained with 0.5 µl of 5 mM CFSE or 1 mM Far Red dye freshly resuspended in 80 µl of PBS. After 5 min of incubation at room temperature, cells were washed twice with 5 % FBS in PBS. The cells were then seeded onto γ-irradiated (20 Gy) HS5 cells in a 20:1 ratio (CLL:HS5), co-cultured and analysed by flow cytometry. The proliferation was analysed using the Proliferation platform in FlowJo v10.8 with manual correction.

### **Viability measurement**

Cell viability was measured by flow cytometry using DiOC6 (3,3'-dihexyloxycarbocyanine iodide, Thermo Fisher Scientific) and propidium iodide (Sigma Aldrich). Cell viability tracked with CSFE or FarRed dye was determined by 7-AAD (7-Aminoactinomycin D, eBioscience).

### **Cell-surface marker staining**

Primary CLL cells or HS5 cell lines were incubated with one or a combination of antibodies (**Tab. S3**) for 20 min at 4 °C and co-stained with SYTOX Blue (Invitrogen) for viability. All measurements were performed on FACS Verse, and cell sorting was done on BD FACS Aria Fusion (both BD Biosciences).

### **Cell cycle analysis**

For cell cycle analysis, cells were fixed in ice-cold 70 % ethanol, washed twice with PBS, and stained with Vindelov's reagent (10 mM TRIS pH 8.0, 10 mM NaCl, 50 ng/ml propidium iodide, 40 ng/ml RNase A) for 30 min at 37 °C. Cell cycle analysis was performed in FlowJo v10.8 using the univariate Watson Pragmatic model with manual correction.

### **Intracellular staining**

For intracellular protein staining, co-cultured primary CLL cells were labelled with eBioscience Fixable Viability Dye eFluor 450 (Invitrogen), fixed with 4 % formaldehyde and 50 % methanol, and then stained with primary rabbit antibodies against Ki67 or MYC (**Tab. S3**) and secondary anti-rabbit

antibody conjugated with Alexa-647 (all Cell Signaling). Data from at least 20 000 events were recorded with FACS Verse and analysed using FlowJo v10.8 software. Normalised expression of intracellular proteins was calculated as the MFI of the protein of interest relative to MFI for only the secondary antibody.

### **Immunoblotting**

Cells were lysed in lysis buffer (1 % SDS, 50 mM TRIS-HCl pH 6.8, 10 % glycerol) with phosphatase and protease inhibitors (Sigma Aldrich) and protein concentration was determined using the DC Protein Assay (BioRad). Equal amounts of protein were separated by SDS-PAGE and transferred to the PVDF membrane (0.45 µm pore size, Millipore). The membranes were incubated with primary antibodies (**Tab. S3**). Secondary horseradish peroxidase-conjugated anti-mouse or anti-rabbit antibodies (Cell Signaling) were used to detect primary antibodies. Immunocomplexes were detected using ECL (BioRad), and the chemiluminescent signal was digitally detected with UVITEC Alliance 4.7.

### **PCR**

The DNA from cell pellets was isolated according to the manufacturer's protocol using the MagCore Genomic DNA Whole Blood Kit (RCB Bioscience). Detection of *EBNA1* and *IL4* gene sequences was performed with PowerUp SYBR Green Master Mix (Applied Biosciences) and PCR products were visualised on 1,2 % agarose gel. For primer sequences see **Tab. S18**.

### **Preparation of microwell inserts for co-culture**

The negative mould was 3D printed using SLA printer Form 3 (FormLabs). The mould was cured with UV light for 20 min and baked at 80 °C for 3 hrs. The inserts were created by pouring poly(dimethylsiloxane) (PDMS, Sylgard 184) silicone elastomer base into the curing agent (10:1) over the printed mould. PDMS was polymerised at 50 °C for 1 h. Solid PDMS inserts were peeled off the mould, cleaned in an ultrasonic bath, sterilized with 70 % ethanol, and dried under UV light. The PDMS inserts were treated with oxygen plasma for 4 min (PE-75, Plasma Etch), covered with sterile 0.1 % gelatin and incubated for 1 h. The inserts were placed in a 12-well plates. Immediately before use, gelatin was removed, wells washed with culture medium and  $4 \times 10^3$  of supportive cells were seeded in 5 µl volume in each of the 16 subarrays of the insert. The cells were left to settle for 5 min and medium was carefully added to the well. On the second day, CLL cells were added to the inserts – medium with factors secreted by stromal cells was carefully aspirated and saved. Slowly,  $4 \times 10^4$  CLL cells were seeded in 5 µl volume in each chamber (with 16 microwells, resulting in  $2.5 \times 10^3$  CLL cells per microwell), left to settle for 5 min, and the saved conditioned medium was returned to the well. The whole culture was maintained for 14 days, and half of the medium volume was carefully exchanged every other day to limit the dilution of factors secreted by supportive cells.



### **IHC staining**

FFPE tissue sections (1 µm) were automatically processed and stained in the VENTANA BenchMark Ultra system. Universal DAB detection kit (Ventana) was used for staining in combination with UltraView amplification kit (Ventana). Counterstaining was achieved by using hematoxylin II (Ventana) and post-counterstaining by using Bluing reagent (Ventana). Immunostaining was performed using anti-CD20 (M0701, DAKO), anti-CD45 (M0755, DAKO), anti-CD105 (BSB 2866, BioSB), anti-CD3 (RBK024, Zytomed systems), or anti-CD5 (NCL-L-CD5-4C7, Leica Biosystems) antibody.

### **FISH**

FISH (Fluorescence in situ hybridisation) in formalin-fixed and paraffin-embedded tissue sections (4 µm) was performed according to the manufacturer's instructions (ZytoLight FISH Tissue Implementation Kit, ZytoVision GmbH, Bremerhaven, Germany). For the detection of del(13q) or tri12, the probe XL DLEU/LAMP/12cen (MetaSystems GmbH, Altlußheim, Germany) was used. The FISH signals were captured using the Nikon Eclipse Niu fluorescence microscope (Nikon Instruments Europe BV, Amsterdam, The Netherlands) and documented using LUCIA Cytogenetics software (Laboratory Imaging s.r.o, Prague, the Czech Rep.).

### **Analysis of immunoglobulin gene rearrangements**

Multiplex PCR amplification of IGH/IGK/IGL gene rearrangements was performed on cDNA or DNA isolated by MagCore Genomic DNA Whole Blood Kit (RCB Bioscience). A standardized BIOMED-2 PCR protocol and sets of primers for VH, DH were used along with appropriate JH primers and primers for Ig kappa and lambda as previously described [6]. The PCR products were denatured and analysed using high-resolution fragment analysis (3130xl Genetic Analyser, Thermo Fisher Scientific). PCR products that showed a monoclonal peak in at least one region were further purified, sequenced, and analysed using the IMGT/V-QUEST alignment tool (version 3.4.13 [http://www.imgt.org/IMGT\\_vquest/vquest](http://www.imgt.org/IMGT_vquest/vquest)).

### **Enzyme-linked immunosorbent assay (ELISA)**

The concentration of IL4 and IL21 cytokines was determined by ELISA assay according to the manufacturer's instructions (ELISA MAX Deluxe Set, Biolegend). The irradiated engineered HS5-CD40L-IL4 or HS5-CD40L-IL4-IL21 cells were cultured for 48 hrs and the conditioned medium was used for IL4/IL21 determination (3 replicates).

### **Statistical analysis**

Differences between paired samples were compared using paired t-test or Wilcoxon matched matched-pairs test and differences in non-matched groups were compared using unpaired t-test or Mann-Whitney U test. The appropriate tests were chosen based on the results of Shapiro-Wilk test of normality. All statistical tests were 2-sided (except if indicated otherwise) and P-values <0.05 were considered significant. The NGS data analysis is described separately in supplemental Methods (see above).

### **Animal experiments**

All animal experiments were approved by the Ministry of Education, Youth and Sports of the Czech Rep., were in line with the ethical regulations, a minimal required number of animals was used, and experiments were conducted by personnel certified to conduct animal experiments. Animals were not randomized into groups or investigators blinded since this was not required by the design of the experiments.

### **Figure graphics**

Schematic figures were created with BioRender.com tool.

## 2) Supplemental Figures

### Supplemental Figure 1

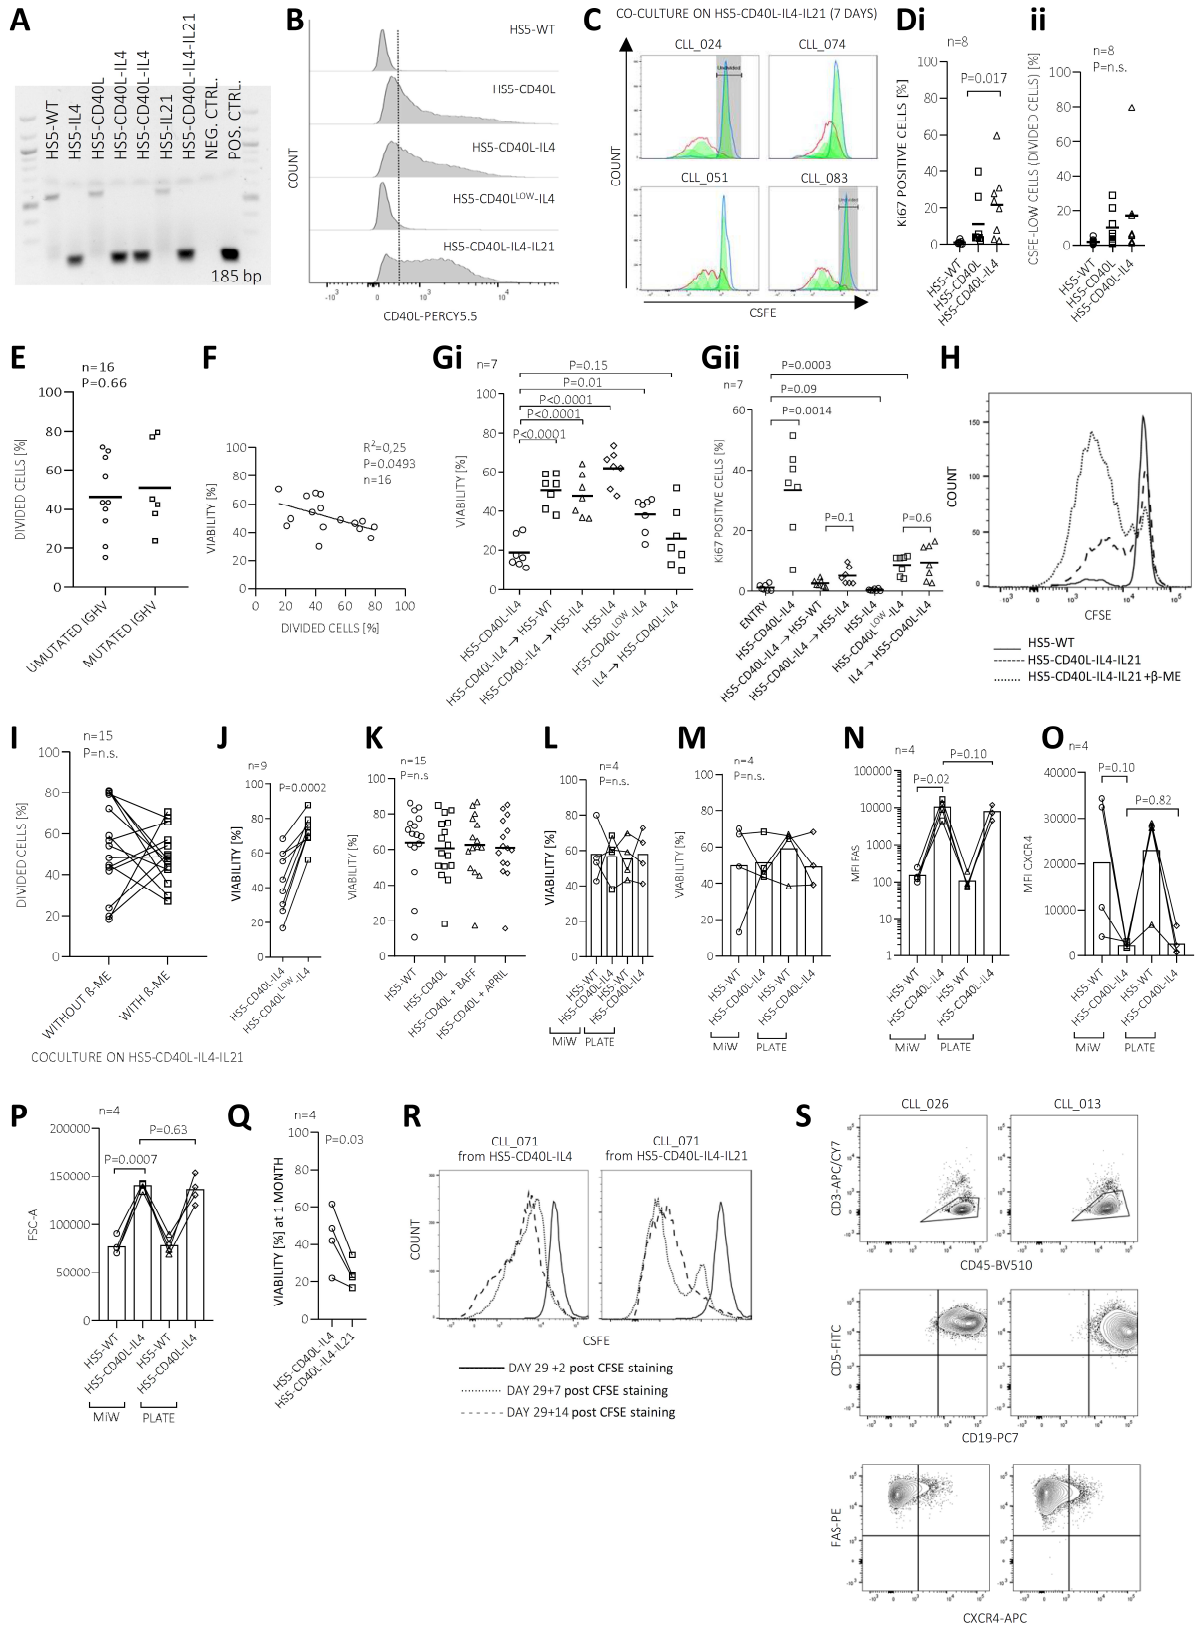

**Supplemental Figure 1:** (A) Detection of inserted *IL4* gene sequence in HS5-engineered cell lines. (B) Cell-surface CD40L levels on engineered HS5 cell lines determined by flow cytometry using CD40L-PerCy5.5 antibody (SONY Biotechnology). (C) Representative histograms of the CFSE dilution in CLL samples co-cultured with HS5-CD40L-IL4-IL21 and presented in the experiment in Fig.1Di. The upper histograms show the results of the co-culture of CLL cells from patients with unmutated IGHV (CLL\_024, CLL\_074), and the bottom histograms from patients with mutated IGHV (CLL\_051, CLL\_083). (D) (i) CLL cells were co-cultured (n=8, 7 days) on irradiated HS5 cells (see labels), fixed, and analyzed by flow cytometry for expression of Ki67. (ii) CLL samples from panel [Di] were loaded with CFSE, co-cultured as described, and at day 7 analyzed for CFSE signal dilution. (E) CLL samples from the experiment presented in Fig. 1Di stratified according to the IGHV status. (F) Correlation between viability and proliferation rate in CLL samples co-cultured with HS5-CD40L-IL4-IL21 for 7 days (samples presented in Fig. 1Di). (G) Viability (Gi) and percentage of Ki67<sup>+</sup> (Gii) CLL cells that were culture under six different conditions before being harvested after a total of 13 days: cultured for 4 days on HS5-CD40L-IL4 or HS5-IL4 or HS5-CD40L<sup>LOW</sup>-IL4 cells and then transferred for additional 9 days onto a fresh layer of the same supportive cells, first co-cultured 4 days on HS5-CD40L-IL4 cells and then transferred to HS5-WT or HS5-IL4 supportive cells for additional 9 days (labeled as HS5-CD40L-IL4→HS5-WT or HS5-CD40L-IL4→HS5-IL4), or first cultured 4 days in the presence of IL4 (10 ng/ml) and then transferred for additional 9 days to HS5-CD40L-IL4 (labeled as IL4→HS5-CD40L-IL4). Culture in media without β-merkaptoethanol. (H) Representative flow cytometry histogram of CFSE dilution in a CLL sample co-cultured (7 days) on HS5-WT (solid line), HS5-CD40L-IL4-IL21 with β-ME (dotted line) and on HS5-CD40L-IL4-IL21 without β-ME (dashed line). (I) Proliferation (show as percentage of divided cells) of CLL cells (n=15) co-cultured on HS5-CD40L-IL4-IL21 without or with 70 nM β-mercaptoethanol (β-ME) for 7 days. (J) Viability of CLL cells (n=9) co-cultured with HS5 cells expressing relatively low (HS5-CD40L<sup>LOW</sup>-IL4) vs. high (HS5-CD40L-IL4) CD40L levels (in media without β-mercaptoethanol). (K) Viability of CLL cells co-cultured for 7 days on HS5-WT or HS5-CD40L supportive cells in the presence or absence of recombinant BAFF or APRIL (50 ng/ml). (L) Viability of CLL cells co-cultured with HS5-WT or HS5-CD40L-IL4 in microwells or in 12-well plate (9 days). (M) Viability of CLL cells co-cultured with HS5-WT or HS5-CD40L-IL4 in microwells (MiW) or in 12-well plate (at 14 days). (N-P) Flow cytometric quantification of FAS (N), CXCR4 (O), and cell size (P) on CLL cells co-cultured with HS5-WT or HS5-CD40L-IL4 cells (9 days) in microwells or 12-well plate. (Q) Viability of CLL cells from Fig. 1J after 28 days of co-culture with HS5-CD40L-IL4 or HS5-CD40L-IL4-IL21 cells. (R) Histograms of CFSE dilution in primary CLL cells after co-culture for 29+2 days (solid line), 29+7 days (dotted line), and 29+14 days (dashed line) with HS5-CD40L-IL4 cells or HS5-CD40L-IL4-IL21 cells. Cells were co-cultured for 29 days, then labeled by CFSE and co-cultured for an additional 2 days (solid line), 7 days (dotted line), and 14 days (dashed line). (S) Flow cytometric characterization of CLL cells (n=2) in long-term co-cultures (analysed at 6 weeks) using antibodies against CD45, CD3, CD5, CD19, CXCR4 and FAS (and SYTOX Blue to discard dead cells).

## Supplemental Figure 2

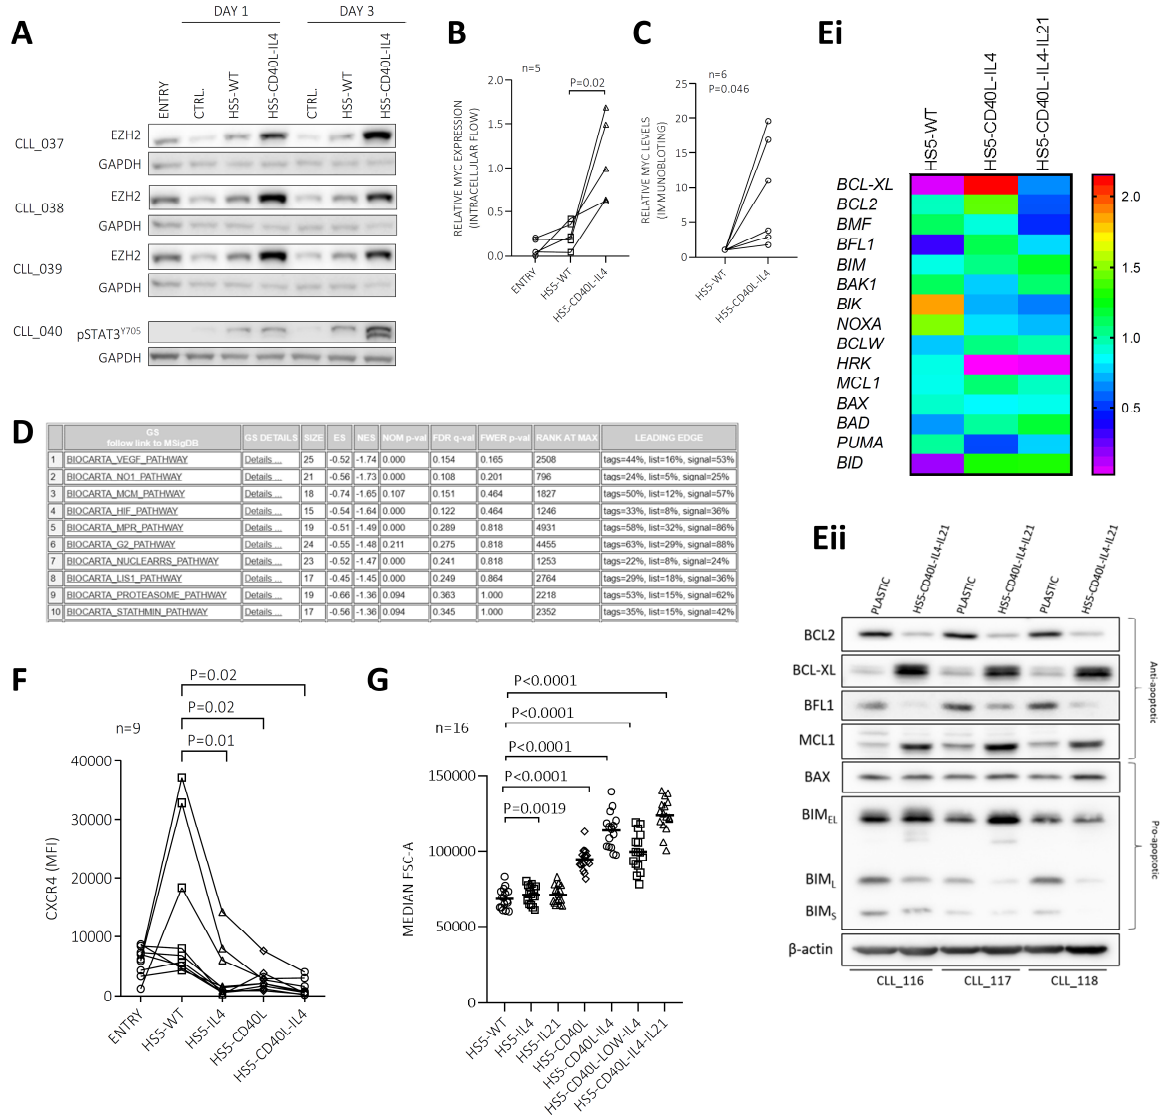

**Supplemental Figure 2:** (A) Control immunoblot from samples used for RNA sequencing of CLL cells cultured on plastic or co-cultured with various HS5 supportive cells. CLL cells were co-cultured for 3 days on HS5-WT or HS5-CD40L-IL4 or without HS5 cells and separated from HS5 cells by sorting (FACS Aria, purity >99 %). Successful interaction between HS5 and CLL cells was detected by up-regulation of EZH2 expression or by STAT3 phosphorylation. (B) Quantification of cMYC level of CLL cells co-cultured on HS5-WT or HS5-CD40L-IL4 cell line or without HS5 cells (3 days) by intracellular flow cytometry. (C) Immunoblot quantification of the cMYC levels in CLL cells co-cultured on HS5-WT or HS5-CD40L-IL4 cells (40 hrs). Normalised to GAPDH. (D) GSEA analysis of gene expression changes between CLL cells co-cultured on HS5-CD40L-IL4 vs. HS5-CD40L-IL4-IL21 cells. (E) The expression of BCL2 family members during co-culture. (i) Heatmap of differentially expressed mRNAs of BCL2 family members in CLL cells (n=3) co-cultured for 3 days on indicated type of HS5 cells. For sample characteristics see Table S1 (CLL No. 047, 043, 044). (ii) Immunoblot from CLL samples co-cultured 7 days with HS5-CD40L-IL4-IL21 or without HS5 cells. The viability of CLL cells (n=3) co-culture vs. cultured on plastic was: 57,6% vs 79,7%; 41% vs 78,8%; and 48,9% vs 53,6%, respectively. For sample characteristics see Table S1 (CLL No. 116-118). (F) Cell-surface CXCR4 on CLL cells (CLL\_019–024) co-cultured for 5 days in the presence of the indicated types of supportive HS5 cells. (G) Median FSC-A (flow cytometry) of CLL cells co-cultured for 7 days with various HS5 supportive cell lines (same samples as in Fig. 1Di).

### Supplemental Figure 3

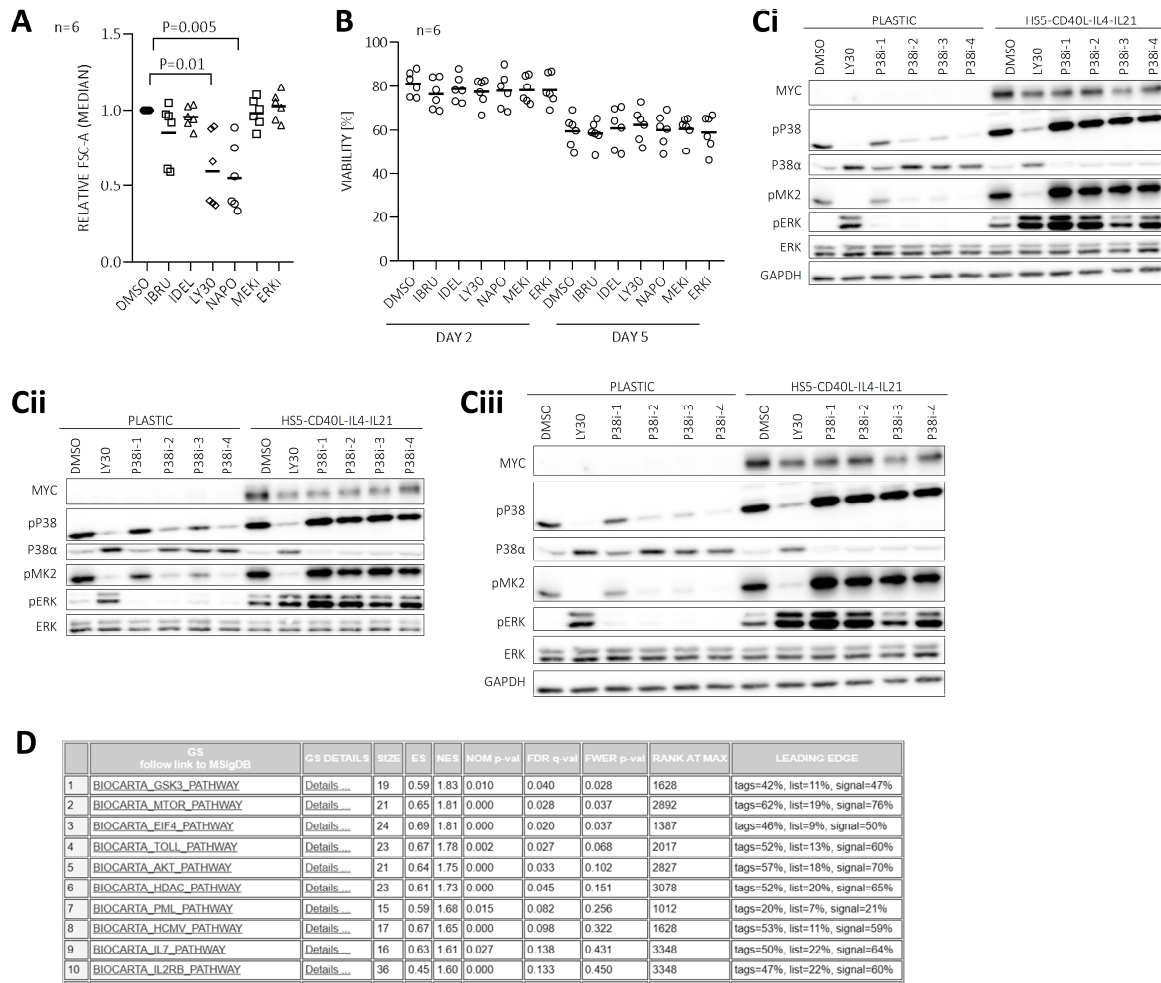

**Supplemental Figure 3: (A)** Median FSC-A (cell size) of CLL cells from the experiment presented in Fig. 3C. **(B)** Viability of the samples presented in Fig. 3C and D after 2 or 5 days. **(A-B)** CLL cells were pre-treated with respective inhibitors for 2 hrs and then co-cultured in the presence of the inhibitors (7 days) on HS5-CD40L-IL4-IL21 cells. IBRU, 2  $\mu$ M ibrutinib; IDEL, 2  $\mu$ M idelalisib; LY30, 2  $\mu$ M LY3009120; NAPO, 10  $\mu$ M naporafenib; MEKi, 2  $\mu$ M PD184352; ERKi, 2  $\mu$ M LY3214996. **(C)** Representative immunoblots of CLL cells co-cultured for 2 days on HS5-CD40L-IL4 in the presence of indicated inhibitors. LY30, 1  $\mu$ M LY3009120; P38i-1, 2  $\mu$ M SB202; P38i-2, 2  $\mu$ M SB203; P38i-3 = 2  $\mu$ M SB239; P38i-4 = 2  $\mu$ M BIRB776. **(D)** GSEA (Biocarta) analysis of pathways with reduced activity in CLL cells co-cultured with HS5-CD40L-IL4-IL21 in the presence of RAF inhibitors. For GSEA we used a list of differentially expressed mRNAs in cells treated with LY3009120 or naporafenib and co-cultured on HS5-CD40L-IL4-IL21 ( $n=4$  for each RAF inhibitor) in comparison to CLL cells co-cultured with HS5-CD40L-IL4-IL21 only ( $n=4$ ).

## Supplemental Figure 4

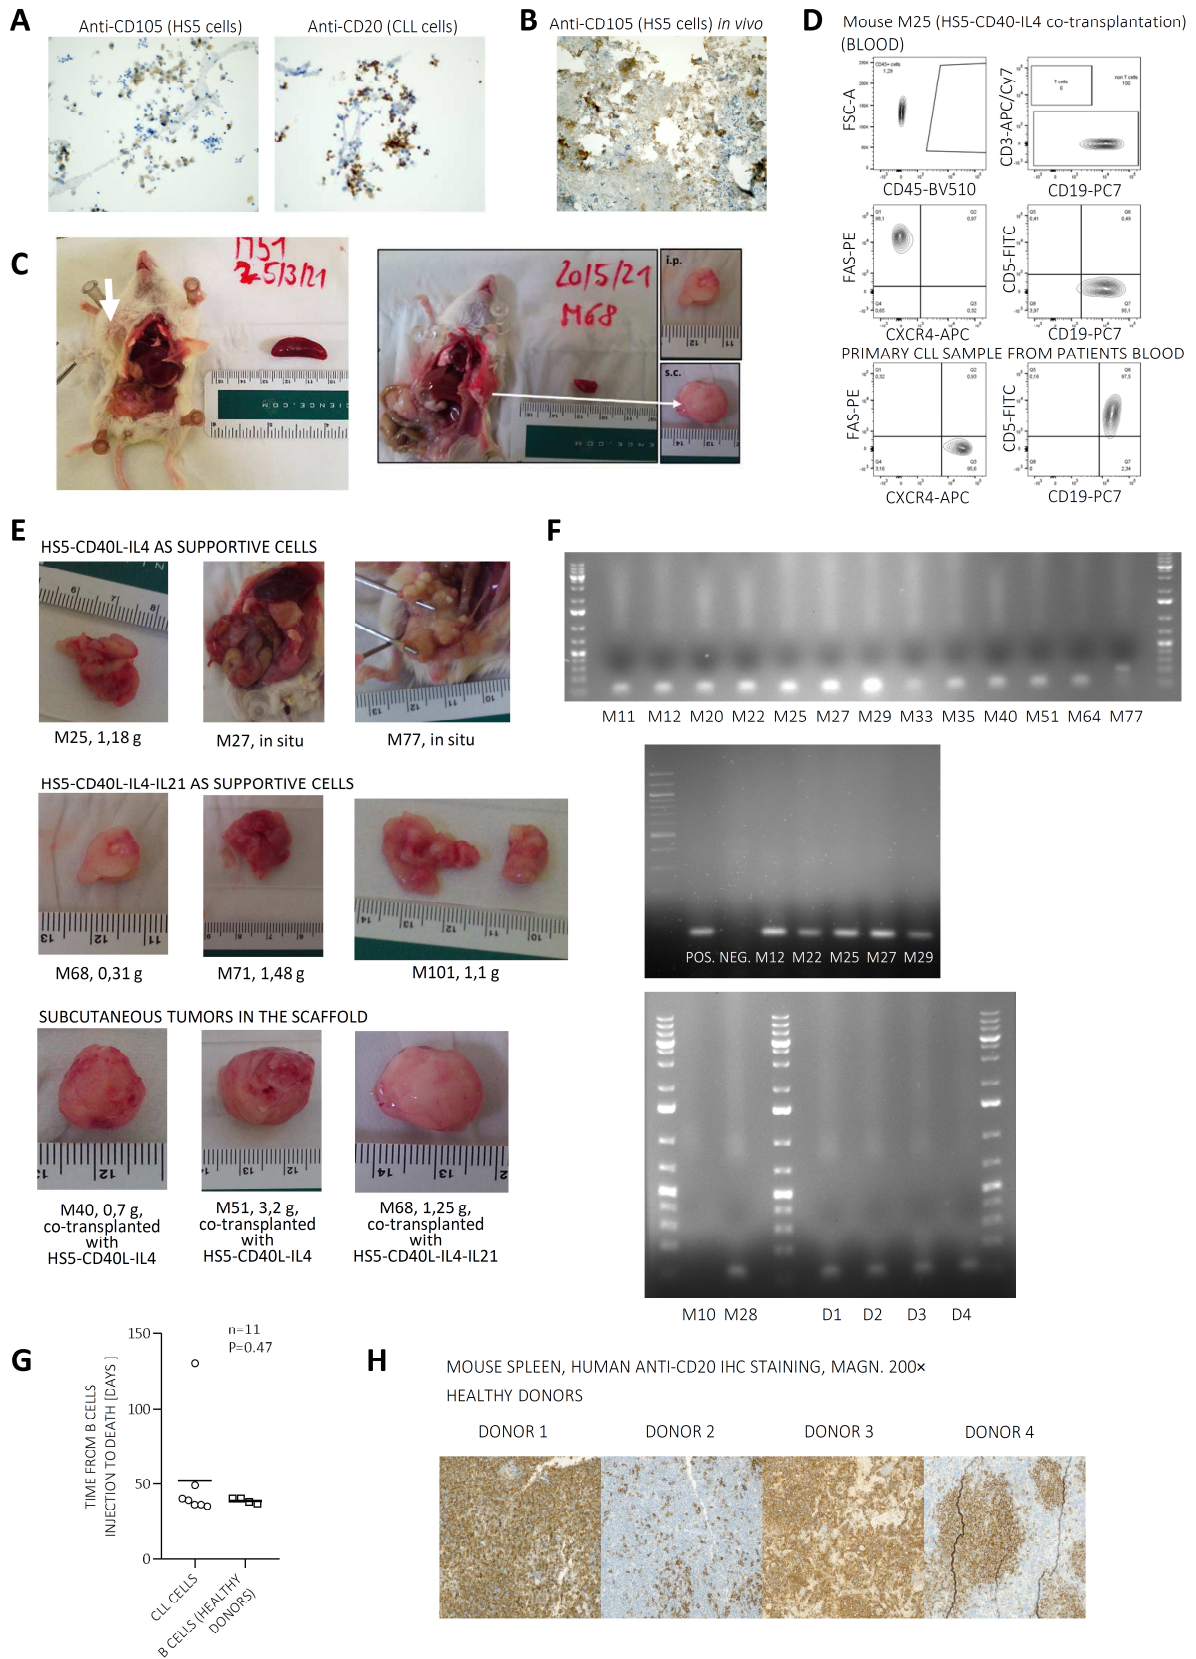



**Supplemental Figure 4:** (A) IHC staining of scaffolds with HS5-CD40L-IL4 and CLL cells (72 hrs of culture). **Left:** anti-CD105 for HS5 cells (brown stain). **Right:** anti-CD20 antibody for CLL cells (brown stain). Magnification 400×. (B) The implanted collagen scaffold loaded with HS5-CD40L-IL4 cells was extracted after 8 weeks and stained with anti-CD105 for HS5. Magnification 400×. (C) **Left:** Representative image of sacrificed mice with engrafted lymphoma in animals transplanted with CLL and HS5-CD40L-IL4 cells. The arrow points to the subcutaneous tumor. **Right:** Representative image of sacrificed mice with tumor mass in animals transplanted with CLL cells and HS5-CD40L-IL4-IL21 cells. Tumors of the presented size grew in each mouse three weeks after injection of CLL cells. Photo of M68 shows only a part of the murine spleen. (D) Immunophenotype (flow cytometry) of lymphomas developed in NSG mice (M25, HS5-CD40L-IL4 co-transplantation). (E) Representative images of tumors developed in experimental mice conditioned with HS5-CD40L-IL4 or HS5-CD40L-IL4-IL21 cells and transplanted with CLL cells. (F) Detection of *EBNA1* in DNA isolated from spleens of mice with developed tumors. The engrafted B cells massively infiltrated the spleen at the time of sacrifice. Positive control (POS.) is DNA from an EBV+ MEC1 cell line, and negative control (NEG) is DNA from an EBV- Ramos cell line. (G) Co-transplantation of HS5-CD40L-IL4-IL21 cells and CLL cells (n=7) or B cells isolated from peripheral blood of healthy donors (n=4, T-cells depleted by OKT3 antibody). The graph indicates the time from CLL/B cell transplantation to mouse termination due to extensive tumor growth (except for 1 mouse sacrificed after 6 months that had no apparent tumour growth). (H) IHC staining (anti-human CD20 antibody) of FFPE sections from the spleen of mice transplanted with B cells from healthy donors. Magnification 200×.



### 3) Supplemental Tables

**Supplemental Table 1: Characteristics of CLL patients**

| CODE | SAMPLE USED IN FIGURE      | SEX [M/F] | AGE AT TIME OF DIAGNOSIS | RAI STAGE AT SAMPLING | CYTOGENETIC ABNORMALITIES | TP53 MUTATIONAL STATUS | IGHV STATUS      |
|------|----------------------------|-----------|--------------------------|-----------------------|---------------------------|------------------------|------------------|
| 001  | 1E                         | F         | 44                       | IIIA                  | Del 13q                   | none                   | M 97.92          |
| 002  | S1G                        | F         | 80                       | IIIA                  | Tri 12                    | none                   | M 92.78          |
| 003  | Tab1                       | M         | 79                       | x                     | x                         | x                      | U 100.0          |
| 004  | 1D,F,G, S1D,E,F,G,I,K, S2G | M         | 50                       | IA                    | Del 13q                   | none                   | M 94.39          |
| 005  | 1D,F,G, S1E,F,I,K, S2G     | M         | 31                       | IIB                   | Del 17p                   | mut                    | U 100.0          |
| 006  | 3H, S2C, S3C               | M         | 65                       | IA                    | Del 13q                   | none                   | M+M 94.16, 87.85 |
| 007  | S1D, 4, S4                 | M         | 56                       | IA/B                  | none                      | none                   | U 100.0          |
| 008  | 3H, S2C, S3C               | M         | 62                       | IIA                   | Del 13q                   | none                   | M 94.44          |
| 009  | S1D, 4, S4                 | F         | 54                       | 0A                    | none                      | none                   | M 91.67          |
| 010  | Tab1                       | F         | 64                       | IIIB                  | Del 11q, Del 13q          | x                      | U 100.0          |
| 011  | 3C,D, S3A,B                | M         | 58                       | x                     | Del 13q                   | mut                    | U 98.26          |
| 012  | 4, S4                      | F         | 69                       | IV                    | Del 13q                   | none                   | U 99.31          |
| 013  | 1J,2D, S1J,Q,S, S2F        | M         | 71                       | IIIA                  | none                      | none                   | U 100.0          |
| 014  | 1D,F,G, S1E,F,I,K, S2C,G   | M         | 73                       | x                     | Del 13q                   | none                   | M 92.52          |
| 015  | 3G, 4, S4                  | F         | 60                       | IA                    | Del 13q                   | none                   | M 92.36          |
| 016  | 4, S4                      | F         | 59                       | 0A                    | Tri 12, Del 13q           | none                   | U/M 100/94.74    |
| 017  | Tab1                       | F         | 65                       | 0A                    | Del 13q                   | none                   | U 98.60          |
| 018  | 1D,F,G, S1E,F,I,K, S2G     | F         | 52                       | IA                    | Del 13q                   | none                   | M 93.40          |
| 020  | 4, S4                      | M         | 71                       | IA                    | none                      | none                   | U 100.0          |
| 021  | 3C,D, S3A,B                | M         | 43                       | 0-IA                  | none                      | x                      | M 93.06          |
| 022  | 4, S4                      | F         | 45                       | IA                    | Del 13q                   | mut                    | M 97.92          |
| 023  | S1G, S2B, 4, S4            | M         | 79                       | IVA                   | Del 13q                   | none                   | U 98.61          |
| 024  | 1D,F,G, S1C,D,E,F,I,K, S2G | F         | 58                       | IVA                   | Del 13q                   | none                   | U 100.0          |
| 025  | 2D, S1J, S2F               | F         | 79                       | IA-B                  | Del 13q                   | none                   | M x              |
| 026  | 1J, 3C,D,H, S1Q,S, S3A,B   | M         | 73                       | IIIA                  | Del 11q, Tri 12           | none                   | U 100.0          |
| 027  | 2C,3B                      | F         | 70                       | x                     | Del 13q                   | none                   | M 89.89          |
| 028  | 1E, 4, S4                  | M         | 47                       | IA                    | none                      | none                   | M 91.5           |
| 029  | 3C,D, S3A,B                | F         | 58                       | x                     | Del 11q                   | none                   | U 100.0          |
| 030  | 4, S4                      | F         | 64                       | II-III A              | Del 13q                   | none                   | M 96.53          |
| 031  | 4, S4                      | F         | 55                       | 0A                    | Del 13q                   | none                   | M x              |
| 033  | 1D,F,G, S1E,F,I,K, S2B,G   | F         | 69                       | x                     | Del 13q, Del 11q          | none                   | M 97.89          |
| 034  | 4, S4                      | M         | 84                       | IVA                   | Del 13q                   | none                   | M x              |
| 035  | 2D, S1J, S2F               | M         | 78                       | IVA                   | Del 11q                   | none                   | U 100.0          |

|     |                                              |   |    |      |                                |            |     |              |
|-----|----------------------------------------------|---|----|------|--------------------------------|------------|-----|--------------|
| 036 | 1D,F,G, Tab1, S1E,F,I,K, S2G                 | F | 59 | IIB  | Del 11q, Del 13q               | none       | U   | 100.0        |
| 037 | 1D,F,G, S1E,F,I,K, S2A,G                     | F | 73 | IVA  | Del 11q, Tri 12, mono X        | none       | U   | 100.0        |
| 038 | S1D, S2A                                     | M | 66 | IVA  | Del 11q, Del 13q               | none       | U   | 100.0        |
| 039 | S2A, 4, S4                                   | M | 74 | IIB  | Del 13q                        | none       | M   | x            |
| 040 | 3C,D, S2A, S3A,B                             | F | 62 | IIIB | Del 13q                        | none       | M   | 97.92        |
| 041 | 4, S4                                        | M | 72 | IIB  | Del 11q, Del 13q               | none       | U   | x            |
| 042 | 2A,B                                         | M | 68 | IIIA | Del 13q                        | none       | M   | 93.06        |
| 043 | 2E, 3E, S2D,E, S3D                           | M | 69 | IIIA | Del 13q                        | none       | M   | 92.01        |
| 044 | 1E, 2E, 3E, S2D,E, S3D                       | M | 70 | IIIA | Del 11q                        | none       | U   | 100.0        |
| 045 | S1D                                          | F | 77 | IVA  | Del 13q                        | none       | U   | 100.0        |
| 046 | Tab1                                         | F | 71 | x    | Del 13q                        | none       | M   | 97.57        |
| 047 | 2E, 3E,F, S2D,E, S3D                         | M | 76 | IA   | Del 11q, Del 13q               | none       | U   | 100.0        |
| 048 | Tab1                                         | F | 59 | x    | Del 13q                        | none       | U   | 100.0        |
| 049 | Tab1                                         | M | 74 | IVA  | Del 13q, Del 6q                | mut        | U   | 99.65        |
| 050 | 1D,F,G, S1E,F,G,I,K, S2G                     | M | 66 | IA   | Del 11q, Del 13q, Del 6q minor | none       | U   | 100.00       |
| 051 | 1D,F,G,I,J, S1C,E,F,G,I,K,L,M,N,O,P,Q, S2C,G | F | 55 | 0A   | Del 13q                        | none       | M   | 94.79        |
| 052 | 4, S4                                        | F | 62 | iA   | Del 13q                        | none       | M   | x            |
| 054 | 2A,B                                         | M | 72 | IIIA | Del 11q, Del 13q               | none       | U   | 100.0        |
| 055 | S1D                                          | M | 68 | IV   | Del 11q                        | none       | U   | 100.0        |
| 056 | S1G, S2B, 4, S4                              | M | 59 | IB   | none                           | mut        | U   | 100.0        |
| 057 | 1D,F,G, S1E,F,I,K, S2G                       | M | 73 | IIB  | Del 11q                        | none       | M   | 97.19        |
| 059 | 2D, S1J, S2F                                 | F | 59 | IA   | Del 13q                        | none       | M   | x            |
| 060 | 2D, S1J, S2F                                 | M | 76 | IVB  | Del 11q, Del 13q               | mut        | x   | x            |
| 061 | S1G                                          | M | 64 | 0A   | Del 13q                        | none       | M+M | 90.72, 92.98 |
| 062 | Tab1                                         | M | 70 | IA   | Del 13q                        | none       |     | 88.19        |
| 063 | 2D, S1J, S2B,F                               | M | 66 | IIB  | Tri 12                         | none       | U   | 100.0        |
| 064 | 3G                                           | M | 65 | IIA  | Del 13q                        | none       | U   | 100.0        |
| 065 | 1B,I, S1L,M,,N,O,P, S2C                      | M | 52 | x    | none                           | minor 3.7% | U   | 100.0        |
| 067 | 2A,B, S2B                                    | M | 73 | IIIA | Del 11q                        | none       | U   | 99.65        |
| 068 | 3H, S3C                                      | F | 73 | IIA  | none                           | none       | U   | 100.0        |
| 069 | 4, S4                                        | M | 62 | IIIA | Del 13q                        | none       | M   | x            |
| 070 | Tab1                                         | F | 62 | IVA  | Del 13q                        | none       | U   | 100.0        |
| 071 | S1R                                          | M | 51 | IIB  | Del 11q, Del 13q               | none       | M   | 94.44        |
| 072 | 1D,F,G, S1E,F,H,I,K, S2G                     | F | 54 | I    | Tri 12                         | none       | U   | 100.0        |
| 073 | 2A,B                                         | M | 58 | IIIB | none                           | none       | U   | 100.0        |

|     |                                 |   |    |      |                  |      |   |       |
|-----|---------------------------------|---|----|------|------------------|------|---|-------|
| 074 | 1D,F,G, S1C,E,F,I,K, S2G, 4, S4 | M | 77 | III  | Del 13q          | none | U | 100.0 |
| 075 | 3C,D, S3A,B                     | F | 53 | IIIB | Tri 8q           | none | U | 99.66 |
| 076 | 2D, S1J, S2F                    | M | 64 | IA   | Tri 12           | none | U | x     |
| 077 | 1I,J, 2D, S1J,L,M,N,O,P,Q, S2F  | F | 72 | IIIA | Del 11q, Del 13q | none | U | 98.64 |
| 078 | 4, S4                           | M | 65 | IA   | Tri 12           | none | U | x     |
| 079 | 4, S4                           | M | 54 | 0A   | Tri 12           | none | U | x     |
| 080 | S1D                             | F | 68 | IV   | Del 13q          | none | U | 100.0 |
| 081 | 1I, S1L,M,N,O,P                 | M | 60 | 0A   | Del 13q          | none | M | 93.33 |
| 082 | 1E                              | F | 76 | IB   | Del 13q          | none | U | x     |
| 083 | 1D,F,G, S1C,E,F,I,K, S2G        | M | x  | x    | x                | x    | M | 87.41 |
| 084 | 1D,F, S1E,F, S2G, 4, S4         | F | 59 | IVB  | none             | mut  | U | x     |
| 085 | 4, S4                           | M | 67 | 0A   | Del 13q          | none | M | x     |
| 086 | 2D, S1J, S2F                    | M | 64 | IVA  | none             | none | x | x     |
| 087 | 4, S4                           | M | 61 | 0A   | Del 17p, Del 13q | del  | U | x     |
| 088 | 3G, 4, S4,                      | F | 54 | 0A   | Del 13q          | none | M | 94.79 |
| 089 | 2E, 3E, S2D, S3D                | M | 63 | I    | Del 13q          | mut  | U | x     |
| 091 | 1A,D,F,G, S1E,F,I,K, S2C,G      | F | 75 | IA   | Del 13q          | none | M | 92.78 |
| 092 | Tab1                            | M | 72 | IV   | Del 13q          | none | U | 100.0 |
| 115 | 3B                              | M | 43 | IA   | Del 13q          | none | U | x     |
| 116 | S2E                             | M | x  | x    | x                | none | U | x     |
| 117 | S2E                             | M | x  | x    | x                | none | U | x     |
| 118 | S2E                             | M | x  | x    | x                | none | U | x     |

„x“ indicates a missing value

**Supplemental Table 2: Characteristics of mouse transplantations**

| CLL CODE | FRESH CLL SAMPLE | MOUSE CODE | CO-TRANSPLANTED HS5 CELL LINE | NO. OF SCAFFOLDS | NO. OF INJECTED HS5 CELLS ( $\times 10^6$ ) | NO. OF INJECTED CLL CELLS ( $\times 10^6$ ) | TIME TO DEATH [DAYS] | SPLEEN WEIGHT [g] | TUMOUR DEVELOPED | TOTAL TUMOUR WEIGHT [g] | MAIN TUMOUR LOCALISATION | IGHV ANALYSIS FROM PATIENT'S CLL CELLS | IGHV HOMOLOGY FROM PATIENT'S CLL CELLS [%] |
|----------|------------------|------------|-------------------------------|------------------|---------------------------------------------|---------------------------------------------|----------------------|-------------------|------------------|-------------------------|--------------------------|----------------------------------------|--------------------------------------------|
| 056      | yes              | M11        | HS5-CD40L-IL4                 | 0                | 29                                          | 150                                         | 54                   | enlarged          | yes              | tumour present          | i.p.                     | 3-11*01                                | 100,0                                      |
| 056      | yes              | M12        | HS5-CD40L-IL4                 | 1                | 12                                          | 166                                         | 54                   | enlarged          | yes              | tumour present          | i.p.                     | 3-11*01                                | 100,0                                      |
| 074      | yes              | M13        | HS5-CD40L-IL4                 | 0                | 3,2                                         | 241                                         | 91                   | normal            | no               | 0                       | none                     | 3-23*01                                | 100,0                                      |
| 074      | yes              | M16        | HS5-CD40L-IL4                 | 2                | 5,5                                         | 84                                          | 89                   | normal            | no               | 0                       | none                     | 3-23*01                                | 100,0                                      |
| 074      | yes              | M17        | HS5-CD40L-IL4                 | 2                | 5,5                                         | 84                                          | 89                   | normal            | no               | 0                       | none                     | 3-23*01                                | 100,0                                      |
| 034      | yes              | M19        | HS5-CD40L-IL4                 | 0                | 10                                          | 26                                          | 84                   | normal            | no               | 0                       | none                     | 4-34*01                                | 93,3                                       |
| 034      | yes              | M20        | HS5-CD40L-IL4                 | 0                | 13,2                                        | 26                                          | 84                   | 0,104             | yes              | tumour present          | i.p.                     | 4-34*01                                | 93,3                                       |
| 034      | yes              | M21        | HS5-CD40L-IL4                 | 2                | 5,5                                         | 26                                          | 84                   | normal            | no               | 0                       | none                     | 4-34*01                                | 93,3                                       |
| 034      | yes              | M22        | HS5-CD40L-IL4                 | 2                | 5,5                                         | 26                                          | 84                   | 0,130             | yes              | 0,897                   | s.c.                     | 4-34*01                                | 93,3                                       |
| 052      | yes              | M25        | HS5-CD40L-IL4                 | 1                | 7,8                                         | 149                                         | 48                   | 0,163             | yes              | 1,18                    | i.p.                     | 2-5*02                                 | 93,5                                       |
| 041      | yes              | M27        | HS5-CD40L-IL4                 | 1                | 7,8                                         | 149                                         | 67                   | 0,323             | yes              | tumour present          | i.p.                     | 3-48*01                                | 100,0                                      |
| 039      | yes              | M29        | HS5-CD40L-IL4                 | 1                | 7,8                                         | 160                                         | 62                   | 0,269             | yes              | 1,278                   | i.p.                     | 3-23*01                                | 89,6                                       |
| 088      | yes              | M31        | HS5-CD40L-IL4                 | 1                | 7,8                                         | 68                                          | 68                   | 0,03              | no               | 0                       | none                     | 3-9*01                                 | 94,8                                       |
| 009      | yes              | M33        | HS5-CD40L-IL4                 | 1                | 5,3                                         | 65                                          | 70                   | 0,110             | yes              | 0,637                   | i.p.                     | 3-23*01                                | 91,7                                       |
| 012      | yes              | M35        | HS5-CD40L-IL4                 | 1                | 7,8                                         | 139                                         | 70                   | 0,147             | yes              | 0,958                   | s.c.                     | 3-21*01                                | 99,3                                       |
| 078      | yes              | M36        | HS5-CD40L-IL4                 | 1                | 7,8                                         | 182                                         | 61                   | 0,024             | no               | 0                       | none                     | 4-4*02                                 | 100,0                                      |
| 088      | yes              | M38        | HS5-CD40L-IL4                 | 1                | 7,8                                         | 200                                         | 132                  | 0,029             | no               | 0                       | none                     | 3-9*01                                 | 94,8                                       |
| 056      | no               | M40        | HS5-CD40L-IL4                 | 1                | 13,1                                        | 112                                         | 81                   | 0,071             | yes              | 0,7                     | s.c.                     | 3-11*01                                | 100,0                                      |

|     |     |      |                    |   |      |     |     |              |     |                |              |                                 |                         |
|-----|-----|------|--------------------|---|------|-----|-----|--------------|-----|----------------|--------------|---------------------------------|-------------------------|
| 084 | yes | M45  | HS5-CD40L-IL4      | 1 | 2,5  | 30  | 186 | normal       | no  | 0              | none         | 1-69*09                         | 100,0                   |
| 034 | no  | M49  | HS5-CD40L-IL4      | 1 | 27,5 | 70  | 140 | 0,037        | no  | 0              | none         | 4-34*01                         | 93,3                    |
| 031 | yes | M50  | HS5-CD40L-IL4      | 1 | 27,5 | 65  | 140 | 0,034        | no  | 0              | none         | 3-23*01 or 3-23D*01             | 91,7                    |
| 007 | yes | M51  | HS5-CD40L-IL4      | 1 | 19,5 | 90  | 56  | 0,588        | yes | 3,2            | s.c.         | 3-23*01 or 3-23D*01             | 100,0                   |
| 085 | yes | M52  | HS5-CD40L-IL4      | 1 | 19,5 | 80  | 127 | 0,025        | no  | 0              | none         | 3-23*01, or 3-23D*01; 4-38-2*01 | 92,0; 94,1<br>biclonal  |
| 085 | yes | M61  | HS5-CD40L-IL4      | 1 | 14,8 | 81  | 130 | 0,038        | no  | 0              | none         | 3-23*01, or 3-23D*01; 4-38-2*01 | 92,0; 94,1<br>biclonal  |
| 022 | yes | M64  | HS5-CD40L-IL4      | 1 | 14,8 | 42  | 94  | not analyzed | yes | tumour present | i.p.         | 3-7*01                          | 97,9                    |
| 015 | yes | M67  | HS5-CD40L-IL4      | 1 | 16,3 | 53  | 96  | 0,035        | no  | 0              | none         | 3-30*02                         | 92,4                    |
| 020 | yes | M70  | HS5-CD40L-IL4      | 1 | 16,3 | 45  | 104 | 0,026        | no  | 0              | none         | 3-23*01 or 3-23D*01             | 100,0                   |
| 030 | yes | M73  | HS5-CD40L-IL4      | 1 | 22,8 | 170 | 167 | 0,055        | no  | 0              | none         | 3-23*01 or 3-23D*01             | 96,5                    |
| 069 | yes | M77  | HS5-CD40L-IL4      | 1 | 25   | 82  | 166 | 0,552        | yes | tumour present | i.p.         | 3-23*01                         | 95,5                    |
| 016 | yes | M82  | HS5-CD40L-IL4      | 0 | 8,5  | 86  | 34  | not analyzed | yes | tumour present | not analyzed | 6-1*01, 4-34*01                 | 100,0; 94,7<br>biclonal |
| 085 | yes | M62  | HS5-CD40L-IL4-IL21 | 1 | 40,4 | 81  | 130 | 0,025        | no  | 0              | none         | 3-23*01, or 3-23D*01; 4-38-2*01 | 92,0; 94,1<br>biclonal  |
| 022 | yes | M65  | HS5-CD40L-IL4-IL21 | 1 | 40,4 | 42  | 49  | 0,5          | yes | tumour present | s.c.         | 3-7*01                          | 97,9                    |
| 015 | yes | M68  | HS5-CD40L-IL4-IL21 | 1 | 18   | 53  | 36  | 0,088        | yes | 1,56           | i.p., s.c.   | 3-30*02                         | 92,4                    |
| 020 | yes | M71  | HS5-CD40L-IL4-IL21 | 1 | 18   | 45  | 36  | 0,165        | yes | 1,48           | i.p.         | 3-23*01 or 3-23D*01             | 100,0                   |
| 030 | yes | M74  | HS5-CD40L-IL4-IL21 | 1 | 19,5 | 170 | 40  | not analyzed | yes | tumour present | i.p.         | 3-23*01, or 3-23D*01            | 96,5                    |
| 069 | yes | M78  | HS5-CD40L-IL4-IL21 | 1 | 19   | 82  | 39  | not analyzed | yes | tumour present | i.p.         | 3-23*01                         | 95,5                    |
| 016 | yes | M83  | HS5-CD40L-IL4-IL21 | 1 | 7,5  | 86  | 35  | 0,075        | yes | tumour present | s.c.         | 6-1*01, 4-34*01                 | 100,0; 94,7<br>biclonal |
| 028 | yes | M98  | HS5-CD40L-IL4-IL21 | 1 | 11,5 | 30  | 33  | 0,176        | yes | 0,54           | i.p.         | 3-72*01                         | 91,5                    |
| 079 | yes | M101 | HS5-CD40L-IL4-IL21 | 0 | 10   | 188 | 26  | 0,232        | yes | 1,1            | i.p.         | 1-18*01                         | 100,0                   |
| 085 | yes | M104 | HS5-CD40L-IL4-IL21 | 0 | 13   | 85  | 92  | 0,042        | no  | 0              | none         | 3-23*01, or 3-23D*01; 4-38-2*01 | 92,0; 94,1<br>biclonal  |

|     |     |      |                                           |   |    |     |     |              |     |                |      |                                 |                        |
|-----|-----|------|-------------------------------------------|---|----|-----|-----|--------------|-----|----------------|------|---------------------------------|------------------------|
| 087 | yes | M107 | HS5-CD40L-IL4-IL21                        | 1 | 17 | 212 | 29  | 0,13         | yes | 0,182          | i.p. | 3-21*01                         | 100,0                  |
| 056 | yes | M9   | NONE - CONTROL TO MICE M5, M6             | 0 | 0  | 300 | 57  | normal       | no  | 0              | none | 3-11*01                         | 100,0                  |
| 056 | yes | M10  | NONE - CONTROL TO MICE M5, M6             | 0 | 0  | 250 | 53  | not analyzed | yes | tumour present | i.p. | 3-11*01                         | 100,0                  |
| 074 | yes | M14  | NONE - CONTROL TO MICE M13, M16, M17      | 0 | 0  | 84  | 90  | normal       | no  | 0              | none | 3-23*01                         | 100,0                  |
| 034 | yes | M18  | NONE - CONTROL TO MICE M19, M20, M21, M22 | 0 | 0  | 81  | 86  | normal       | no  | 0              | none | 4-34*01                         | 93,3                   |
| 074 | no  | M23  | NONE - CONTROL TO MICE M13, M16, M17      | 0 | 0  | 93  | 90  | normal       | no  | 0              | none | 3-23*01                         | 100,0                  |
| 052 | yes | M24  | NONE - CONTROL TO MOUSE M25               | 0 | 0  | 149 | 51  | 0,033        | no  | 0              | none | 2-5*02                          | 93,5                   |
| 041 | yes | M26  | NONE - CONTROL TO MOUSE M26               | 0 | 0  | 149 | 71  | 0,038        | no  | 0              | none | 3-48*01                         | 100,0                  |
| 039 | yes | M28  | NONE - CONTROL TO MOUSE M29               | 0 | 0  | 160 | 65  | 0,148        | yes | 0,278          | i.p. | 3-23*01                         | 89,6                   |
| 088 | yes | M30  | NONE - CONTROL TO MOUSE M31               | 0 | 0  | 68  | 68  | 0,036        | no  | 0              | none | 3-9*01                          | 94,8                   |
| 009 | yes | M32  | NONE - CONTROL TO MOUSE M32               | 0 | 0  | 65  | 70  | 0,030        | no  | 0              | none | 3-23*01                         | 91,7                   |
| 012 | yes | M34  | NONE - CONTROL TO MOUSE M35               | 0 | 0  | 139 | 61  | 0,034        | no  | 0              | none | 3-21*01                         | 99,3                   |
| 088 | yes | M37  | NONE - CONTROL TO MOUSE M38               | 0 | 0  | 200 | 132 | 0,021        | no  | 0              | none | 3-9*01                          | 94,8                   |
| 085 | yes | M60  | NONE - CONTROL TO MICE M61, M62           | 0 | 0  | 81  | 130 | 0,026        | no  | 0              | none | 3-23*01, or 3-23D*01; 4-38-2*01 | 92,0; 94,1<br>biclinal |
| 031 | yes | M53  | NONE - CONTROL TO MOUSE M50               | 0 | 0  | 65  | 140 | 0,016        | no  | 0              | none | 3-23*01 or 3-23D*01             | 91,7                   |
| 085 | yes | M58  | NONE - CONTROL TO MOUSE M52               | 0 | 0  | 80  | 127 | 0,027        | no  | 0              | none | 3-23*01, or 3-23D*01; 4-38-2*01 | 92,0; 94,1<br>biclinal |
| 007 | yes | M59  | NONE - CONTROL TO MOUSE M51               | 0 | 0  | 90  | 127 | 0,023        | no  | 0              | none | 3-23*01 or 3-23D*01             | 100,0                  |
| 022 | yes | M63  | NONE - CONTROL TO MICE M64, M65           | 0 | 0  | 42  | 103 | 0,03         | no  | 0              | none | 3-7*01                          | 97,9                   |
| 015 | yes | M66  | NONE - CONTROL TO MICE M67, M68           | 0 | 0  | 53  | 96  | 0,02         | no  | 0              | none | 3-30*02                         | 92,4                   |

|     |     |      |                                 |   |   |     |     |       |    |   |      |                      |                         |
|-----|-----|------|---------------------------------|---|---|-----|-----|-------|----|---|------|----------------------|-------------------------|
| 020 | yes | M69  | NONE - CONTROL TO MICE M70, M71 | 0 | 0 | 45  | 104 | 0,03  | no | 0 | none | 3-23*01 or 3-23D*01  | 100,0                   |
| 030 | yes | M72  | NONE - CONTROL TO MICE M73, M74 | 0 | 0 | 170 | 167 | 0,027 | no | 0 | none | 3-23*01, or 3-23D*01 | 96,5                    |
| 069 | yes | M76  | NONE - CONTROL TO MICE M77, M78 | 0 | 0 | 82  | 166 | 0,03  | no | 0 | none | 3-23*01              | 95,5                    |
| 016 | yes | M81  | NONE - CONTROL TO MICE M82, M83 | 0 | 0 | 86  | 206 | 0,025 | no | 0 | none | 6-1*01, 4-34*01      | 100,0; 94,7<br>biclinal |
| 023 | yes | M97  | NONE - CONTROL TO MOUSE M97     | 0 | 0 | 30  | 98  | 0,03  | no | 0 | none | 3-72*01              | 91,5                    |
| 079 | yes | M100 | NONE - CONTROL TO MOUSE M101    | 0 | 0 | 188 | 78  | 0,284 | no | 0 | none | 1-18*01              | 100,0                   |
| 085 | yes | M103 | NONE - CONTROL TO MOUSE M104    | 0 | 0 | 85  | 92  | 0,03  | no | 0 | none | 3-23*01, or 3-23D*01 | 92,0 biclinal           |
| 087 | yes | M106 | NONE - CONTROL TO MOUSE M107    | 0 | 0 | 212 | 83  | 0,02  | no | 0 | none | 3-21*01              | 100,0                   |

**Supplemental Table 3: Antibodies used in the study.**

| PROTEIN                       | CLONE  | PRODUCER        | CATALOG CODE | DILUTION      | CONJUGATE |
|-------------------------------|--------|-----------------|--------------|---------------|-----------|
| 2°Ab anti-rabbit              | –      | Cell Signaling  | 4414S        | 1:500         | Alexa 647 |
| BAX                           | D2E11  | Cell Signaling  | 5023         | 1:2000        | –         |
| BCL2                          | D55G8  | Cell Signaling  | 4223         | 1:2000        | –         |
| BCL-XL                        | –      | Cell Signaling  | 2764         | 1:1000        | –         |
| BFL-1                         | D1A1C  | Cell Signaling  | 14093        | 1:1000        | –         |
| BIM                           | C34C5  | Cell Signaling  | 2933         | 1:1000        | –         |
| CD105                         | –      | Beckman Coulter | A07414       | 3 µl/sample   | PE        |
| CD154                         | 24-31  | SONY            | 2154170      | 10 µl/sample  | PerCy5.5  |
| CD19                          | –      | Beckman Coulter | IM3628       | 2 µl/sample   | PC7       |
| CD20                          | 2H7    | SONY            | 2111590      | 2 µl/sample   | Alexa647  |
| CD45                          | HI30   | SONY            | 2120040      | 2 µl/sample   | BV510     |
| CD5                           | UCHT2  | SONY            | 2103030      | 2 µl/sample   | FITC      |
| CXCR4                         | 12G5   | SONY            | 2132590      | 3 µl/sample   | BV421     |
| ERK1/2                        | –      | Cell Signaling  | 9102         | 1:3000        | –         |
| ERK1/2 (T202/Y204)            | 197G2  | Cell Signaling  | 4377         | 1:2000        | –         |
| Fas                           | DX2    | SONY            | 2128040      | 1–5 µl/sample | PE        |
| GAPDH                         | –      | Cell Signaling  | 97166        | 1:5000        | –         |
| IgM                           | MHM-88 | SONY            | 2172530      | 3 µl/sample   | FITC      |
| IKK $\alpha$                  | –      | Cell Signaling  | 2682         | 1:1000        | –         |
| IKK $\alpha/\beta$ (S176/180) | –      | Cell Signaling  | 2697         | 1:1000        | –         |
| IKK $\beta$                   | –      | Cell Signaling  | 8943         | 1:1000        | –         |
| Ki67                          | D3B5   | Cell Signaling  | 9129         | 1:400         | –         |
| Light chain kappa             | TB28-2 | SONY            | 2563550      | 3 µl/sample   | FITC      |
| Light chain lambda            | MHL-38 | SONY            | 2183050      | 3 µl/sample   | APC       |
| MCL1                          | –      | Cell Signaling  | 4572         | 1:2000        | –         |
| MYC                           | –      | Cell Signaling  | 9402         | 1:1000        | –         |
| p38 (T180/Y182)               | –      | Cell Signaling  | 4511         | 1:1000        | –         |
| STAT1                         | –      | Cell Signaling  | 14994        | 1:2000        | –         |
| STAT1 (Y701)                  | –      | Cell Signaling  | 9167         | 1:1000        | –         |
| STAT3                         | –      | Cell Signaling  | 12640        | 1:2000        | –         |
| STAT3 (Y705)                  | –      | Cell Signaling  | 9131         | 1:1000        | –         |
| STAT6                         | –      | Cell Signaling  | 5397         | 1:1000        | –         |
| STAT6 (Y641)                  | –      | Cell Signaling  | 9361S        | 1:1000        | –         |



**Supplemental Table 4:** Top 20 cytokines predicted as potential upstream regulators (Ingenuity Pathway Analysis, QIAGEN), causing the observed gene expression changes in **CXCR4/CD5 subpopulations**. Z-scores that are  $\geq 2$  represent predictions of highly significant activation (in CXCR4<sup>dim</sup>CD5<sup>dim</sup> cells), while z-scores  $\leq -2$  are for predictions of highly significant inhibitions.

| UPSTREAM REGULATOR |                                              | PREDICTED ACTIVATION STATE | ACTIVATION Z-SCORE | B-H CORRECTED P-VALUE | PRODUCING CELL TYPE                                                                    |
|--------------------|----------------------------------------------|----------------------------|--------------------|-----------------------|----------------------------------------------------------------------------------------|
| <b>IL4</b>         | <b>Interleukin 4</b>                         | <b>Activated</b>           | <b>3.455</b>       | <b>5.77E-29</b>       | <b>T cells, mast cells, basophils, eosinophils, and others</b>                         |
| TNF                | Tumor Necrosis Factor                        | Activated                  | 4.162              | 1.31E-26              | Macrophages, T cells, NK cells, mast cells                                             |
| IL2                | Interleukin 2                                | Activated                  | 3.823              | 2.89E-26              | Activated T cells                                                                      |
| IFNG               | Interferon Gamma                             | Activated                  | 6.445              | 5.18E-25              | T cells, NK cells                                                                      |
| IL15               | Interleukin 15                               | Activated                  | 3.851              | 2.21E-20              | Monocytes, macrophages, dendritic cells                                                |
| <b>CD40LG</b>      | <b>CD40 Ligand</b>                           | <b>Activated</b>           | <b>2.811</b>       | <b>8.34E-15</b>       | <b>Activated T cells, dendritic cells, B cells</b>                                     |
| CSF1               | Colony-Stimulating Factor 1                  | Activated                  | 4.27               | 1.21E-14              | Monocytes, macrophages                                                                 |
| IL33               | Interleukin 33                               | Activated                  | 2.799              | 2.03E-11              | Various cell types including epithelial cells, dendritic cells                         |
| IL1B               | Interleukin 1 Beta                           | Activated                  | 4.402              | 2.73E-11              | Macrophages, monocytes, and others                                                     |
| IL5                | Interleukin 5                                | Activated                  | 4.164              | 6.58E-11              | T cells, eosinophils                                                                   |
| CSF2               | Colony-Stimulating Factor 2                  | Activated                  | 4.037              | 2.46E-10              | T cells, macrophages, endothelial cells                                                |
| IFNA2              | Interferon Alpha 2                           | Activated                  | 5.759              | 2.72E-10              | Lymphocytes, monocytes, and others                                                     |
| IL13               | Interleukin 13                               | Activated                  | 2.743              | 2.38E-07              | T cells, macrophages, basophils                                                        |
| IL33               | Interleukin 33                               | Activated                  | 2.988              | 2.41E-07              | Myeloid cells, endothelial cells                                                       |
| CSF3               | Colony Stimulating Factor 3                  | –                          | 0.204              | 2.62E-07              | Various cell types including epithelial cells, dendritic cells, mast cells, and others |
| PRL                | Prolactin                                    | Activated                  | 3.122              | 2.24E-06              | Prolactin-producing cells in the pituitary and others                                  |
| IL6                | Interleukin 6                                | –                          | 0.802              | 2.98E-06              | B cells, T cells, macrophages, endothelial cells                                       |
| <b>IL21</b>        | <b>Interleukin 21</b>                        | <b>Activated</b>           | <b>2.39</b>        | <b>1.95E-05</b>       | <b>Activated T cells, NK cells, dendritic cells</b>                                    |
| TNFSF13B           | Tumor Necrosis Factor Superfamily Member 13B | Activated                  | 2                  | 2.31E-05              | Activated T cells, B cells                                                             |
| IFNL1              | Interferon Lambda 1                          | Activated                  | 4.26               | 6.76E-05              | Various cell types in response to viral infection                                      |

**Supplemental Table 5:** Top 20 cytokines predicted as potential upstream regulators (Ingenuity Pathway Analysis, QIAGEN), causing the observed gene expression changes in lymph-nodes vs. peripheral blood CLL cells (dataset from Sun et al., 2022 [7]).

Z-scores that are  $\geq 2$  represent predictions of highly significant activation (in lymph node cells), while z-scores  $\leq -2$  are for predictions of highly significant inhibitions.

|               | UPSTREAM REGULATOR                          | PREDICTED ACTIVATION STATE | ACTIVATION Z-SCORE | B-H CORRECTED P-VALUE | PRODUCING CELL TYPE                                     |
|---------------|---------------------------------------------|----------------------------|--------------------|-----------------------|---------------------------------------------------------|
| TNF           | Tumor Necrosis Factor                       | –                          | 4.877              | 1.02E-46              | Macrophages, T cells, NK cells, mast cells, neutrophils |
| CSF2          | Colony Stimulating Factor 2                 | Activated                  | 7.696              | 1.48E-40              | Macrophages, T cells, fibroblasts, endothelial cells    |
| IL2           | Interleukin 2                               | Activated                  | 5.574              | 4.86E-34              | T cells, B cells, NK cells                              |
| IL6           | Interleukin 6                               | Activated                  | 3.473              | 4.74E-33              | Macrophages, T cells, endothelial cells                 |
| IL1B          | Interleukin 1 Beta                          | Activated                  | 4.75               | 8.80E-33              | Macrophages, dendritic cells, T cells                   |
| IFNG          | Interferon Gamma                            | –                          | 1.873              | 1.29E-29              | T cells, NK cells                                       |
| <b>IL4</b>    | <b>Interleukin 4</b>                        | <b>Activated</b>           | <b>3.472</b>       | <b>3.33E-26</b>       | <b>T cells, mast cells, basophils</b>                   |
| IL33          | Interleukin 33                              | Activated                  | 2.473              | 1.59E-22              | Dendritic cells, mast cells, endothelial cells          |
| IL10          | Interleukin 10                              | –                          | 0.071              | 2.41E-21              | T cells, macrophages                                    |
| CSF1          | Colony Stimulating Factor 1                 | Activated                  | 3.765              | 7.04E-20              | Macrophages, monocytes                                  |
| IL15          | Interleukin 15                              | Activated                  | 2.795              | 1.66E-15              | Monocytes, macrophages, dendritic cells                 |
| IL13          | Interleukin 13                              | Activated                  | 2.099              | 3.49E-15              | T cells, mast cells, eosinophils                        |
| OSM           | Oncostatin M                                | Activated                  | 4.144              | 4.77E-15              | Macrophages, T cells                                    |
| IL17A         | Interleukin 17A                             | –                          | 1.94               | 1.43E-14              | T cells, neutrophils                                    |
| IL18          | Interleukin 18                              | Activated                  | 4.939              | 3.19E-14              | Monocytes, macrophages, dendritic cells                 |
| IL7           | Interleukin 7                               | Activated                  | 3.043              | 8.99E-13              | Stromal cells, osteoblasts                              |
| TNFSF11       | Tumor Necrosis Factor Superfamily Member 11 | Activated                  | 3.682              | 2.47E-12              | T cells, B cells, dendritic cells                       |
| <b>CD40LG</b> | <b>CD40 Ligand</b>                          | <b>Activated</b>           | <b>3.676</b>       | <b>3.59E-12</b>       | <b>T cells, B cells</b>                                 |
| IL3           | Interleukin 3                               | Activated                  | 4.656              | 2.06E-11              | Macrophages, T cells                                    |
| <b>IL21</b>   | <b>Interleukin 21</b>                       | <b>Activated</b>           | <b>3.779</b>       | <b>8.09E-11</b>       | <b>T cells, B cells, dendritic cells</b>                |

**Supplemental Table 6:** Top 20 cytokines predicted as potential upstream regulators (Ingenuity Pathway Analysis, Qiagen), causing the observed gene expression changes in CLL cells cultured with T-cells (dataset from Pascutti et al., 2013 [8]).

Z-scores that are  $\geq 2$  represent predictions of highly significant activation (after CLL-T cell contact), while z-scores  $\leq -2$  are for predictions of highly significant inhibitions.

|               | UPSTREAM REGULATOR          | PREDICTED ACTIVATION STATE | ACTIVATION Z-SCORE | B-H CORRECTED P-VALUE | PRODUCING CELL TYPE                                             |
|---------------|-----------------------------|----------------------------|--------------------|-----------------------|-----------------------------------------------------------------|
| <b>IL4</b>    | <b>Interleukin 4</b>        | <b>Activated</b>           | <b>3.084</b>       | <b>7.17E-70</b>       | <b>T cells, mast cells, basophils</b>                           |
| IL2           | Interleukin 2               | Activated                  | 7.46               | 3.41E-68              | T cells, B cells, NK cells                                      |
| <b>CD40LG</b> | <b>CD40 Ligand</b>          | <b>Activated</b>           | <b>5.903</b>       | <b>4.72E-58</b>       | <b>T cells, B cells</b>                                         |
| IFNG          | Interferon gamma            | Activated                  | 9.598              | 5.83E-57              | T cells, NK cells                                               |
| CSF1          | Colony Stimulating Factor 1 | Activated                  | 2.866              | 2.27E-43              | Macrophages, monocytes                                          |
| IL15          | Interleukin 15              | Activated                  | 5.872              | 4.44E-43              | Monocytes, macrophages, dendritic cells                         |
| TNF           | Tumor Necrosis Factor       | Activated                  | 9.141              | 1.69E-42              | Macrophages, T cells, NK cells, mast cells, neutrophils         |
| IFNA2         | Interferon alpha 2          | Activated                  | 7.065              | 5.41E-42              | Various cells, including macrophages and dendritic cells        |
| IL1B          | Interleukin 1 beta          | Activated                  | 8.021              | 1.39E-39              | Macrophages, dendritic cells, T cells                           |
| IL5           | Interleukin 5               | Activated                  | 4.103              | 3.44E-36              | T cells, eosinophils, mast cells                                |
| <b>IL21</b>   | <b>Interleukin 21</b>       | <b>Activated</b>           | <b>5.79</b>        | <b>1.61E-34</b>       | <b>T cells, B cells, dendritic cells</b>                        |
| IL27          | Interleukin 27              | Activated                  | 4.438              | 9.68E-34              | Activated T cells                                               |
| IL10          | Interleukin 10              | Inhibited                  | -2.865             | 5.19E-32              | Macrophages, T cells                                            |
| IL33          | Interleukin 33              | Activated                  | 6.094              | 7.73E-32              | Dendritic cells, mast cells, endothelial cells                  |
| IFNB1         | Interferon beta 1           | Activated                  | 4.442              | 1.17E-31              | Various cells, including macrophages and dendritic cells        |
| CSF2          | Colony Stimulating Factor 2 | Activated                  | 5.974              | 3.46E-31              | Macrophages, T cells, fibroblasts, endothelial cells            |
| IFNL1         | Interferon lambda 1         | Activated                  | 6.487              | 1.29E-29              | Multiple cell types, including fibroblasts and epithelial cells |
| IL3           | Interleukin 3               | Activated                  | 4.666              | 1.30E-29              | T cells, mast cells, eosinophils                                |
| IL7           | Interleukin 7               | Activated                  | 4.73               | 1.60E-29              | Stromal cells, osteoblasts                                      |
| IL6           | Interleukin 6               | Activated                  | 6.192              | 2.26E-27              | Macrophages, T cells                                            |

**Supplemental Table 7:** Concentration of cytokines in conditioned media from HS5-WT cells (48 hrs).  
 Courtesy of Prof. S. Ansell (Mayo Clinic, US).

| CYTOKINE | CONCENTRATION IN HS5 CELLS<br>CONDITIONED MEDIUM [pg/ml] |
|----------|----------------------------------------------------------|
| MCP-1    | 68380.51                                                 |
| G-CSF    | 36846.78                                                 |
| IL-8     | 32050.03                                                 |
| IL-6     | 16866.27                                                 |
| GM-CSF   | 3956.08                                                  |
| VEGF     | 800.99                                                   |
| IL-15    | 794.78                                                   |
| IL-2R    | 463.15                                                   |
| HGF      | 433.36                                                   |
| FGF-b    | 424.2                                                    |
| IL-1RA   | 306.03                                                   |
| IL-12    | 259.41                                                   |
| MIG      | 234.39                                                   |
| RANTES   | 141.17                                                   |
| IL-7     | 132.16                                                   |
| IFN-a    | 114.78                                                   |
| MIP-1a   | 74.29                                                    |
| IL-13    | 63.85                                                    |
| IL-1b    | 58.84                                                    |
| IFN-g    | 49.56                                                    |
| IP-10    | 42.7                                                     |
| MIP-1b   | 34.91                                                    |
| EGF      | 30.76                                                    |
| IL-10    | 27.46                                                    |
| Eotaxin  | 16.68                                                    |
| TNF-a    | 9.02                                                     |
| IL-4     | <38.96                                                   |
| IL-17    | <26.47                                                   |
| IL-2     | <12.21                                                   |
| IL-5     | <9.97                                                    |

**Supplemental Table 8:** List of generated HS5-derived cell lines.

| GENERATED HS5 CELL LINES      |                                                                                                              |
|-------------------------------|--------------------------------------------------------------------------------------------------------------|
| HS5-WT                        | wild-type cell line derived from human bone marrow cells, immortalized by HPV-16 E6/E7 (cell line from DSMZ) |
| HS5-CD40L                     | HS5 cells expressing human CD40 ligand (CD40L).                                                              |
| HS5-IL4                       | HS5 cells expressing human interleukin 4 (IL4).                                                              |
| HS5-IL21                      | HS5 cells expressing human interleukin 21 (IL21).                                                            |
| HS5-CD40L-IL4                 | HS5 cells expressing CD40L and IL4.                                                                          |
| HS5-CD40L <sup>LOW</sup> -IL4 | HS5 cells expressing IL4 and low level of CD40L.                                                             |
| HS5-CD40L-IL4-IL21            | HS5 cells expressing CD40L, IL4 and IL21.                                                                    |

**Supplemental Table 9:** List of top differentially expressed mRNAs in CLL cells co-cultured on HS5-CD40L-IL4 cells vs. HS5-WT cells. Top 30 up-regulated and top 30 down-regulated mRNAs are included.

|    | GENE ID         | GENE NAME  | BASE MEAN<br>[READS PER<br>MILLION] | FOLD CHANGE<br>[log2] | ADJUSTED<br>P-VALUE |
|----|-----------------|------------|-------------------------------------|-----------------------|---------------------|
| 1  | ENSG00000128594 | LRRC4      | 94                                  | 7.10                  | 9.73E-18            |
| 2  | ENSG00000102962 | CCL22      | 3606                                | 7.07                  | 2.12E-41            |
| 3  | ENSG00000119508 | NR4A3      | 761                                 | 7.05                  | 2.64E-74            |
| 4  | ENSG00000164236 | ANKRD33B   | 465                                 | 6.20                  | 1.10E-42            |
| 5  | ENSG00000234965 | SHISA8     | 216                                 | 6.01                  | 2.34E-41            |
| 6  | ENSG00000110237 | ARHGEF17   | 225                                 | 5.61                  | 2.59E-21            |
| 7  | ENSG00000102970 | CCL17      | 1853                                | 5.31                  | 2.45E-25            |
| 8  | ENSG00000183087 | GAS6       | 150                                 | 5.23                  | 3.13E-19            |
| 9  | ENSG00000168758 | SEMA4C     | 126                                 | 5.23                  | 6.09E-26            |
| 10 | ENSG00000114737 | CISH       | 2849                                | 4.96                  | 1.06E-53            |
| 11 | ENSG00000049249 | TNFRSF9    | 238                                 | 4.85                  | 4.21E-21            |
| 12 | ENSG00000184557 | SOCS3      | 721                                 | 4.84                  | 7.38E-39            |
| 13 | ENSG00000171992 | SYNPO      | 123                                 | 4.82                  | 1.19E-46            |
| 14 | ENSG00000074416 | MGLL       | 298                                 | 4.79                  | 1.29E-33            |
| 15 | ENSG00000173404 | INSM1      | 190                                 | 4.68                  | 7.90E-15            |
| 16 | ENSG00000243440 | AF130351.1 | 29                                  | 4.61                  | 7.03E-10            |
| 17 | ENSG00000123685 | BATF3      | 871                                 | 4.59                  | 4.21E-31            |
| 18 | ENSG00000165030 | NFIL3      | 1240                                | 4.13                  | 8.43E-40            |
| 19 | ENSG00000148671 | ADIRF      | 38                                  | 4.08                  | 1.98E-10            |
| 20 | ENSG00000147434 | CHRNA6     | 85                                  | 3.96                  | 4.92E-16            |
| 21 | ENSG00000166016 | ABTB2      | 78                                  | 3.95                  | 1.74E-14            |
| 22 | ENSG00000105246 | EBI3       | 52                                  | 3.90                  | 4.71E-11            |
| 23 | ENSG00000189334 | S100A14    | 27                                  | 3.89                  | 3.85E-09            |
| 24 | ENSG00000163975 | MELTF      | 427                                 | 3.85                  | 2.20E-15            |
| 25 | ENSG00000158481 | CD1C       | 38                                  | 3.81                  | 3.95E-11            |
| 26 | ENSG00000171552 | BCL2L1     | 576                                 | 3.81                  | 2.32E-37            |
| 27 | ENSG00000137726 | FXVD6      | 18                                  | 3.78                  | 5.11E-09            |
| 28 | ENSG00000157017 | GHRL       | 18                                  | 3.71                  | 2.44E-07            |
| 29 | ENSG00000137571 | SLCO5A1    | 47                                  | 3.71                  | 1.02E-15            |
| 30 | ENSG00000163704 | PRRT3      | 86                                  | 3.67                  | 4.01E-28            |
| 1  | ENSG00000108551 | RASD1      | 48                                  | -4.86                 | 6.07E-14            |
| 2  | ENSG00000135116 | HRK        | 308                                 | -4.53                 | 2.44E-35            |
| 3  | ENSG00000154102 | C16orf74   | 165                                 | -3.42                 | 1.53E-17            |
| 4  | ENSG00000168878 | SFTPB      | 68                                  | -3.21                 | 4.09E-13            |
| 5  | ENSG00000165029 | ABCA1      | 97                                  | -3.00                 | 5.95E-12            |
| 6  | ENSG00000119917 | IFIT3      | 100                                 | -2.91                 | 1.78E-11            |

|    |                 |          |      |       |          |
|----|-----------------|----------|------|-------|----------|
| 7  | ENSG00000106565 | TMEM176B | 59   | -2.84 | 1.12E-06 |
| 8  | ENSG00000085563 | ABCB1    | 60   | -2.77 | 4.29E-08 |
| 9  | ENSG00000102760 | RGCC     | 199  | -2.69 | 1.74E-12 |
| 10 | ENSG00000162894 | FCMR     | 2052 | -2.65 | 1.25E-20 |
| 11 | ENSG00000092200 | RPGRIP1  | 6    | -2.64 | 7.82E-04 |
| 12 | ENSG00000171617 | ENC1     | 54   | -2.64 | 6.62E-08 |
| 13 | ENSG00000163563 | MNDA     | 101  | -2.62 | 4.42E-17 |
| 14 | ENSG00000124256 | ZBP1     | 33   | -2.60 | 7.02E-08 |
| 15 | ENSG00000278195 | SSTR3    | 24   | -2.52 | 2.75E-06 |
| 16 | ENSG00000004799 | PDK4     | 35   | -2.52 | 8.69E-07 |
| 17 | ENSG00000185745 | IFIT1    | 46   | -2.49 | 7.78E-08 |
| 18 | ENSG00000007516 | BAIAP3   | 92   | -2.41 | 2.27E-07 |
| 19 | ENSG00000166707 | ZCCHC18  | 131  | -2.37 | 8.86E-12 |
| 20 | ENSG00000134042 | MRO      | 12   | -2.36 | 6.90E-04 |
| 21 | ENSG00000169252 | ADRB2    | 121  | -2.35 | 1.40E-12 |
| 22 | ENSG00000145416 | MARCH1   | 569  | -2.34 | 3.10E-17 |
| 23 | ENSG00000129355 | CDKN2D   | 603  | -2.32 | 1.05E-17 |
| 24 | ENSG00000029534 | ANK1     | 111  | -2.28 | 7.41E-11 |
| 25 | ENSG00000179088 | C12orf42 | 29   | -2.27 | 4.48E-06 |
| 26 | ENSG00000004399 | PLXND1   | 173  | -2.27 | 2.06E-06 |
| 27 | ENSG00000182871 | COL18A1  | 58   | -2.22 | 1.48E-06 |
| 28 | ENSG00000182866 | LCK      | 143  | -2.21 | 1.29E-18 |
| 29 | ENSG00000170819 | BFSP2    | 11   | -2.21 | 9.71E-05 |
| 30 | ENSG00000139278 | GLIPR1   | 257  | -2.19 | 3.12E-19 |

\*30 most up-regulated genes (=positive fold-change) and down-regulated (= negative fold-change) in CLL cocultured on HS5-CD40L-IL4 cells

**Supplemental Table 10:** List of top differentially expressed mRNAs in CLL cells co-cultured on HS5-CD40L-IL4-IL21 cells vs. HS5-WT cells. Top 30 up-regulated and top 30 down-regulated mRNAs are included.

|    | GENE ID         | GENE NAME | BASE MEAN<br>[READS PER<br>MILLION] | FOLD CHANGE<br>[log2] | ADJUSTED<br>P-VALUE |
|----|-----------------|-----------|-------------------------------------|-----------------------|---------------------|
| 1  | ENSG00000184557 | SOCS3     | 797                                 | 6.84                  | 1.08E-94            |
| 2  | ENSG00000164236 | ANKRD33B  | 552                                 | 6.50                  | 1.00E-60            |
| 3  | ENSG00000123685 | BATF3     | 934                                 | 5.67                  | 2.70E-61            |
| 4  | ENSG00000214290 | COLCA2    | 110                                 | 5.19                  | 6.07E-22            |
| 5  | ENSG00000102962 | CCL22     | 3102                                | 5.18                  | 3.11E-30            |
| 6  | ENSG00000165030 | NFIL3     | 1293                                | 5.17                  | 1.33E-80            |
| 7  | ENSG00000114737 | CISH      | 3160                                | 5.11                  | 1.04E-75            |
| 8  | ENSG00000100453 | GZMB      | 243                                 | 4.99                  | 1.81E-22            |
| 9  | ENSG00000110237 | ARHGEF17  | 206                                 | 4.98                  | 3.63E-21            |
| 10 | ENSG00000074416 | MGLL      | 295                                 | 4.92                  | 2.05E-41            |
| 11 | ENSG00000148200 | NR6A1     | 73                                  | 4.83                  | 3.64E-19            |
| 12 | ENSG00000049249 | TNFRSF9   | 215                                 | 4.78                  | 3.61E-21            |
| 13 | ENSG00000119508 | NR4A3     | 676                                 | 4.74                  | 2.43E-39            |
| 14 | ENSG00000150637 | CD226     | 325                                 | 4.66                  | 3.81E-36            |
| 15 | ENSG00000183087 | GAS6      | 137                                 | 4.64                  | 3.37E-21            |
| 16 | ENSG00000162433 | AK4       | 17                                  | 4.42                  | 7.22E-12            |
| 17 | ENSG00000104951 | IL4I1     | 1241                                | 4.40                  | 2.22E-31            |
| 18 | ENSG00000050405 | LIMA1     | 276                                 | 4.24                  | 2.89E-35            |
| 19 | ENSG00000102970 | CCL17     | 1834                                | 4.13                  | 2.63E-24            |
| 20 | ENSG00000234965 | SHISA8    | 205                                 | 4.08                  | 6.28E-26            |
| 21 | ENSG00000025039 | RRAGD     | 62                                  | 4.06                  | 2.50E-17            |
| 22 | ENSG00000177494 | ZBED2     | 40                                  | 3.99                  | 4.71E-11            |
| 23 | ENSG00000144130 | NT5DC4    | 29                                  | 3.97                  | 2.62E-12            |
| 24 | ENSG00000185338 | SOCS1     | 934                                 | 3.96                  | 5.00E-42            |
| 25 | ENSG00000166016 | ABTB2     | 72                                  | 3.96                  | 7.51E-19            |
| 26 | ENSG00000185215 | TNFAIP2   | 481                                 | 3.87                  | 1.89E-23            |
| 27 | ENSG00000136848 | DAB2IP    | 105                                 | 3.85                  | 3.89E-20            |
| 28 | ENSG00000147434 | CHRNA6    | 86                                  | 3.81                  | 1.51E-17            |
| 29 | ENSG00000171174 | RBKS      | 109                                 | 3.70                  | 3.11E-26            |
| 30 | ENSG00000117586 | TNFSF4    | 362                                 | 3.66                  | 8.55E-33            |
| 1  | ENSG00000108551 | RASD1     | 40                                  | -5.22                 | 2.22E-16            |
| 2  | ENSG00000135116 | HRK       | 269                                 | -4.52                 | 3.81E-36            |
| 3  | ENSG00000154102 | C16orf74  | 178                                 | -4.04                 | 6.69E-30            |
| 4  | ENSG00000185745 | IFIT1     | 57                                  | -3.87                 | 2.66E-16            |
| 5  | ENSG00000112799 | LY86      | 82                                  | -3.75                 | 1.05E-28            |
| 6  | ENSG00000183960 | KCNH8     | 25                                  | -3.61                 | 1.52E-13            |



|    |                 |             |      |       |          |
|----|-----------------|-------------|------|-------|----------|
| 7  | ENSG00000119917 | IFIT3       | 117  | -3.53 | 1.33E-18 |
| 8  | ENSG00000163563 | MNDA        | 103  | -3.34 | 3.74E-26 |
| 9  | ENSG00000093072 | ADA2        | 373  | -3.30 | 1.00E-21 |
| 10 | ENSG00000004399 | PLXND1      | 174  | -3.27 | 3.56E-14 |
| 11 | ENSG00000092200 | RPGRIP1     | 5    | -3.24 | 3.15E-06 |
| 12 | ENSG00000134042 | MRO         | 12   | -3.22 | 2.44E-08 |
| 13 | ENSG00000165029 | ABCA1       | 83   | -3.22 | 2.91E-16 |
| 14 | ENSG00000162894 | FCMR        | 2002 | -3.20 | 1.46E-36 |
| 15 | ENSG00000106565 | TMEM176B    | 47   | -3.14 | 3.11E-08 |
| 16 | ENSG00000079337 | RAPGEF3     | 79   | -3.14 | 2.71E-20 |
| 17 | ENSG00000257127 | CLLU1       | 68   | -3.10 | 2.01E-26 |
| 18 | ENSG00000106003 | LFNG        | 489  | -3.09 | 8.82E-27 |
| 19 | ENSG00000171617 | ENC1        | 52   | -3.09 | 2.61E-13 |
| 20 | ENSG00000168878 | SFTPB       | 61   | -3.09 | 1.99E-15 |
| 21 | ENSG00000152784 | PRDM8       | 229  | -3.06 | 3.62E-46 |
| 22 | ENSG00000260314 | MRC1        | 17   | -3.04 | 7.02E-10 |
| 23 | ENSG00000132359 | RAP1GAP2    | 58   | -2.97 | 1.28E-14 |
| 24 | ENSG00000183624 | HMCES       | 208  | -2.95 | 3.93E-24 |
| 25 | ENSG00000197880 | MDS2        | 8    | -2.93 | 9.52E-07 |
| 26 | ENSG00000175857 | GAPT        | 58   | -2.93 | 8.13E-16 |
| 27 | ENSG00000114812 | VIPR1       | 85   | -2.91 | 7.36E-25 |
| 28 | ENSG00000255274 | TMPRSS4-AS1 | 14   | -2.88 | 1.45E-08 |
| 29 | ENSG00000115009 | CCL20       | 6    | -2.87 | 2.87E-05 |
| 30 | ENSG00000068831 | RASGRP2     | 689  | -2.81 | 1.22E-24 |

\*30 most up-regulated genes (=positive fold-change) and down-regulated (= negative fold-change) in CLL cocultured on HS5-CD40L-IL4-IL21 cells

**Supplemental Table 11: Inhibitors and recombinant cytokines used in the study.**

| REAGENT        | CHARACTERISATION                      | MANUFACTURER | SOLVENT | CONCENTRATION<br>IN THE EXPERIMENTS |
|----------------|---------------------------------------|--------------|---------|-------------------------------------|
| Ibrutinib      | BTK inhibitor                         | Selleckchem  | DMSO    | 2 $\mu$ M                           |
| Idelalisib     | PI3K inhibitor                        | Selleckchem  | DMSO    | 2 $\mu$ M                           |
| LY3009120      | pan-RAF inhibitor                     | Selleckchem  | DMSO    | 2 $\mu$ M                           |
| Naporafenib    | pan-RAF inhibitor                     | Selleckchem  | DMSO    | 10 $\mu$ M                          |
| PD184352       | MEK inhibitor                         | Selleckchem  | DMSO    | 2 $\mu$ M                           |
| LY3214996      | ERK inhibitor                         | Selleckchem  | DMSO    | 2 $\mu$ M                           |
| Interleukin 4  | cytokine                              | PeprTech     | 5% BSA  | 10 ng/ml                            |
| Interleukin 21 | cytokine                              | PeprTech     | 5% BSA  | 25 ng/ml                            |
| CD40L          | cytokine                              | PeprTech     | 5% BSA  | 1 $\mu$ g/ml                        |
| BAFF           | cytokine                              | PeprTech     | 5% BSA  | 50 ng/ml                            |
| APRIL          | cytokine                              | PeprTech     | 5% BSA  | 50 ng/ml                            |
| SB202190       | p38 $\alpha$ / $\beta$ MAPK inhibitor | Selleckchem  | DMSO    | 2–10 $\mu$ M                        |
| SB203580       | p38 MAPK inhibitor                    | Selleckchem  | DMSO    | 2–10 $\mu$ M                        |
| SB239063       | p38 $\alpha$ / $\beta$ MAPK inhibitor | Selleckchem  | DMSO    | 2–10 $\mu$ M                        |
| BIRB796        | pan-p38 MAPK inhibitor                | Selleckchem  | DMSO    | 2–10 $\mu$ M                        |

**Supplemental Table 12: Protein-coding genes in MAPK signaling pathway with significantly changed expression (n=95 out of 267 genes in KEGG pathways) in CLL cells co-cultured on HS5-CD40L-IL4-IL21 cells compared to HS5-WT cells. In the figure below, the changed genes are indicated in orange, and multiple related genes are aggregated under one protein name (as per KEGG pathway settings).**

| GENE ID         | GENE NAME | BASE MEAN [READS PER MILLION] | FOLD CHANGE [log2] | ADJUSTED P-VALUE |
|-----------------|-----------|-------------------------------|--------------------|------------------|
| ENSG00000163513 | TGFBR2    | 650                           | -2,04              | 8,73E-33         |
| ENSG00000166501 | PRKCB     | 6272                          | -1,79              | 1,81E-31         |
| ENSG00000168067 | MAP4K2    | 483                           | -1,50              | 3,15E-25         |
| ENSG00000068831 | RASGRP2   | 689                           | -2,81              | 1,22E-24         |
| ENSG00000138166 | DUSP5     | 563                           | 2,74               | 7,60E-23         |
| ENSG00000026103 | FAS       | 403                           | 3,04               | 2,40E-22         |
| ENSG00000095015 | MAP3K1    | 3051                          | -1,65              | 3,39E-19         |
| ENSG00000146535 | GNA12     | 1840                          | 1,38               | 8,07E-19         |
| ENSG00000162889 | MAPKAPK2  | 2076                          | -0,92              | 4,25E-16         |
| ENSG00000213281 | NRAS      | 551                           | 0,97               | 1,30E-13         |
| ENSG00000114738 | MAPKAPK3  | 178                           | 1,70               | 1,38E-13         |
| ENSG00000136997 | MYC       | 541                           | 2,89               | 1,52E-13         |
| ENSG00000116473 | RAP1A     | 2678                          | 0,94               | 3,82E-12         |
| ENSG00000169967 | MAP3K2    | 890                           | -0,74              | 9,16E-12         |
| ENSG00000157388 | CACNA1D   | 166                           | 2,78               | 1,62E-11         |
| ENSG00000101224 | CDC25B    | 893                           | -1,72              | 9,19E-11         |
| ENSG00000185386 | MAPK11    | 114                           | 2,29               | 1,02E-10         |
| ENSG00000077150 | NFKB2     | 357                           | 1,63               | 7,40E-10         |
| ENSG00000108861 | DUSP3     | 174                           | 0,92               | 1,13E-09         |
| ENSG00000138834 | MAPK8IP3  | 326                           | -0,85              | 2,21E-09         |
| ENSG00000123739 | PLA2G12A  | 191                           | 0,96               | 4,35E-09         |
| ENSG00000125952 | MAX       | 1265                          | -0,58              | 2,04E-08         |
| ENSG00000109320 | NFKB1     | 1202                          | 0,93               | 2,11E-08         |
| ENSG00000130159 | ECSIT     | 124                           | 0,95               | 2,53E-08         |
| ENSG00000197461 | PDGFA     | 64                            | 2,27               | 2,68E-08         |
| ENSG00000141837 | CACNA1A   | 112                           | -1,56              | 3,86E-08         |
| ENSG00000126934 | MAP2K2    | 597                           | 0,80               | 6,92E-08         |
| ENSG00000120910 | PPP3CC    | 487                           | -1,02              | 1,80E-07         |
| ENSG00000130522 | JUND      | 2728                          | -1,25              | 2,09E-07         |
| ENSG00000188130 | MAPK12    | 8                             | 2,94               | 1,10E-06         |
| ENSG00000079277 | MKNK1     | 797                           | 0,86               | 2,05E-06         |
| ENSG00000138814 | PPP3CA    | 819                           | -0,80              | 2,75E-06         |
| ENSG00000183943 | PRKX      | 320                           | -0,71              | 3,50E-06         |
| ENSG00000198909 | MAP3K3    | 376                           | -0,52              | 4,25E-06         |
| ENSG00000180370 | PAK2      | 928                           | -0,54              | 7,74E-06         |
| ENSG00000119699 | TGFB3     | 27                            | -1,41              | 1,57E-05         |
| ENSG00000177885 | GRB2      | 5570                          | 0,48               | 1,60E-05         |
| ENSG00000101109 | STK4      | 3042                          | -0,53              | 2,29E-05         |
| ENSG00000143851 | PTPN7     | 463                           | -0,89              | 2,49E-05         |
| ENSG00000141480 | ARRB2     | 281                           | -0,73              | 2,74E-05         |
| ENSG00000187446 | CHP1      | 655                           | 0,66               | 6,44E-05         |
| ENSG00000149269 | PAK1      | 292                           | 0,57               | 8,54E-05         |
| ENSG00000120129 | DUSP1     | 251                           | -1,46              | 0,00011          |
| ENSG00000067182 | TNFRSF1A  | 122                           | -0,94              | 0,00012          |
| ENSG00000184545 | DUSP8     | 22                            | 1,53               | 0,00016          |
| ENSG00000100485 | SOS2      | 417                           | -0,53              | 0,00016          |
| ENSG00000070831 | CDC42     | 2236                          | 0,46               | 0,00023          |

Continuation:

|                 |          |      |       |         |
|-----------------|----------|------|-------|---------|
| ENSG00000276023 | DUSP14   | 73   | 1,02  | 0,00023 |
| ENSG00000177189 | RPS6KA3  | 941  | -0,69 | 0,00027 |
| ENSG00000160551 | TAOK1    | 926  | -0,40 | 0,00030 |
| ENSG00000196924 | FLNA     | 1173 | -0,61 | 0,00030 |
| ENSG00000135341 | MAP3K7   | 553  | -0,42 | 0,00040 |
| ENSG00000085511 | MAP3K4   | 239  | -0,47 | 0,00041 |
| ENSG00000128272 | ATF4     | 3718 | 0,85  | 0,00041 |
| ENSG00000120875 | DUSP4    | 216  | 1,62  | 0,00048 |
| ENSG00000126767 | ELK1     | 237  | 0,58  | 0,00048 |
| ENSG00000099942 | CRKL     | 657  | -0,37 | 0,00051 |
| ENSG00000109971 | HSPA8    | 499  | 0,66  | 0,00062 |
| ENSG00000204390 | HSPA1L   | 51   | -0,90 | 0,00067 |
| ENSG00000034152 | MAP2K3   | 809  | -0,48 | 0,00080 |
| ENSG00000117676 | RPS6KA1  | 365  | 0,52  | 0,00115 |
| ENSG00000115904 | SOS1     | 601  | -0,55 | 0,00116 |
| ENSG00000112062 | MAPK14   | 500  | -0,33 | 0,00117 |
| ENSG00000104365 | IKKBK    | 753  | -0,65 | 0,00175 |
| ENSG00000169032 | MAP2K1   | 992  | 0,74  | 0,00208 |
| ENSG00000115590 | IL1R2    | 2    | 0,09  | 0,00216 |
| ENSG00000123358 | NR4A1    | 82   | -1,48 | 0,00248 |
| ENSG00000081189 | MEF2C    | 2328 | 0,63  | 0,00259 |
| ENSG00000128340 | RAC2     | 2258 | 0,57  | 0,00285 |
| ENSG00000136068 | FLNB     | 398  | 0,68  | 0,00376 |
| ENSG00000100784 | RPS6KA5  | 401  | -0,78 | 0,00385 |
| ENSG00000155903 | RASA2    | 403  | -0,50 | 0,00481 |
| ENSG00000135090 | TAOK3    | 1169 | -0,33 | 0,00607 |
| ENSG00000112658 | SRF      | 992  | 0,64  | 0,00627 |
| ENSG00000172575 | RASGRP1  | 156  | 1,04  | 0,00652 |
| ENSG00000071242 | RPS6KA2  | 523  | 0,92  | 0,00652 |
| ENSG00000076984 | MAP2K7   | 352  | -0,51 | 0,01023 |
| ENSG00000109756 | RAPGEF2  | 176  | -0,65 | 0,01169 |
| ENSG00000136238 | RAC1     | 1991 | 0,38  | 0,01220 |
| ENSG00000126803 | HSPA2    | 26   | 0,99  | 0,01482 |
| ENSG00000099875 | MKNK2    | 1688 | -0,31 | 0,01847 |
| ENSG00000196712 | NF1      | 298  | -0,45 | 0,01907 |
| ENSG00000125538 | IL1B     | 27   | -1,18 | 0,02311 |
| ENSG00000204389 | HSPA1A   | 488  | -0,63 | 0,02384 |
| ENSG00000099860 | GADD45B  | 1310 | 0,60  | 0,02394 |
| ENSG00000151062 | CACNA2D4 | 40   | -0,63 | 0,02481 |
| ENSG00000158711 | ELK4     | 779  | -0,36 | 0,02719 |
| ENSG00000173327 | MAP3K11  | 162  | -0,37 | 0,03280 |
| ENSG00000142733 | MAP3K6   | 38   | 0,71  | 0,03336 |
| ENSG00000100968 | NFATC4   | 46   | 0,77  | 0,03370 |
| ENSG00000100614 | PPM1A    | 693  | 0,31  | 0,03715 |
| ENSG00000107968 | MAP3K8   | 586  | 0,57  | 0,03862 |
| ENSG00000132155 | RAF1     | 499  | -0,39 | 0,04171 |
| ENSG00000126458 | RRAS     | 74   | 0,61  | 0,04355 |
| ENSG00000133818 | RRAS2    | 533  | -0,42 | 0,04488 |

\* positive fold-change indicates induction after co-culture

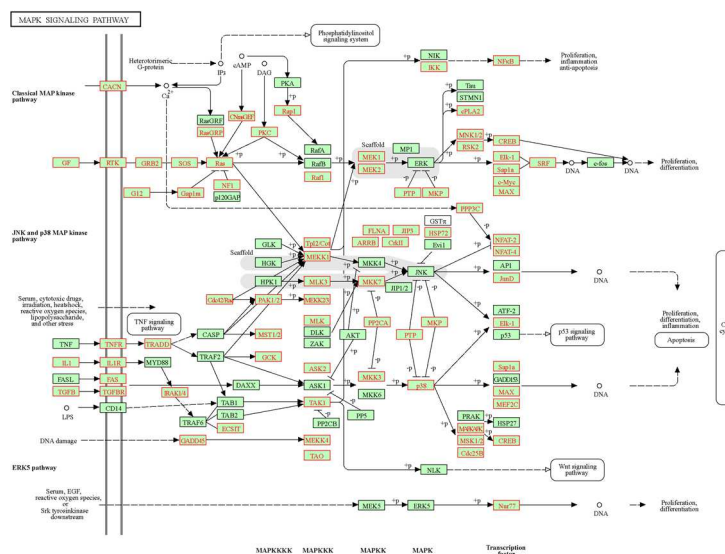

**Supplemental Table 13:** List of top differentially expressed mRNAs in CLL cells co-cultured on HS5-CD40L-IL4-IL21 cells without vs. with 2  $\mu$ M LY3009120. Top 30 up-regulated and top 30 down-regulated mRNAs included.

|    | GENE ID         | GENE NAME  | BASE MEAN<br>[READS PER<br>MILLION] | FOLD CHANGE<br>[log2] | ADJUSTED<br>P-VALUE |
|----|-----------------|------------|-------------------------------------|-----------------------|---------------------|
| 1  | ENSG00000162433 | AK4        | 17                                  | 4.07                  | 6.51E-09            |
| 2  | ENSG00000143847 | PPFIA4     | 30                                  | 3.10                  | 7.34E-08            |
| 3  | ENSG00000243440 | AF130351.1 | 23                                  | 2.57                  | 2.41E-05            |
| 4  | ENSG00000189060 | H1FO       | 35                                  | 2.31                  | 2.41E-05            |
| 5  | ENSG00000136010 | ALDH1L2    | 10                                  | 2.30                  | 2.46E-02            |
| 6  | ENSG00000134323 | MYCN       | 27                                  | 2.24                  | 1.83E-04            |
| 7  | ENSG00000131981 | LGALS3     | 73                                  | 2.20                  | 9.74E-09            |
| 8  | ENSG00000177469 | CAVIN1     | 15                                  | 2.20                  | 6.74E-06            |
| 9  | ENSG00000027869 | SH2D2A     | 15                                  | 2.19                  | 7.56E-04            |
| 10 | ENSG00000169429 | CXCL8      | 90                                  | 2.16                  | 2.18E-05            |
| 11 | ENSG00000196611 | MMP1       | 58                                  | 2.10                  | 1.02E-04            |
| 12 | ENSG00000108641 | B9D1       | 14                                  | 2.09                  | 3.57E-05            |
| 13 | ENSG00000167414 | GNG8       | 194                                 | 2.06                  | 2.76E-06            |
| 14 | ENSG00000197594 | ENPP1      | 15                                  | 2.04                  | 2.46E-03            |
| 15 | ENSG00000151012 | SLC7A11    | 5                                   | 2.01                  | 2.00E-02            |
| 16 | ENSG00000171848 | RRM2       | 38                                  | 1.97                  | 2.39E-04            |
| 17 | ENSG00000105825 | TFPI2      | 130                                 | 1.97                  | 2.41E-05            |
| 18 | ENSG00000135643 | KCNMB4     | 17                                  | 1.91                  | 2.11E-03            |
| 19 | ENSG00000177181 | RIMKLA     | 10                                  | 1.86                  | 5.86E-03            |
| 20 | ENSG00000114268 | PFKFB4     | 36                                  | 1.86                  | 2.84E-04            |
| 21 | ENSG00000179111 | HES7       | 26                                  | 1.84                  | 6.72E-05            |
| 22 | ENSG00000181649 | PHLDA2     | 40                                  | 1.83                  | 4.48E-04            |
| 23 | ENSG00000116014 | KISS1R     | 62                                  | 1.81                  | 1.72E-04            |
| 24 | ENSG00000136040 | PLXNC1     | 80                                  | 1.80                  | 1.86E-08            |
| 25 | ENSG00000168268 | NT5DC2     | 35                                  | 1.78                  | 2.79E-04            |
| 26 | ENSG00000162896 | PIGR       | 154                                 | 1.78                  | 1.11E-04            |
| 27 | ENSG00000119508 | NR4A3      | 676                                 | 1.78                  | 1.18E-05            |
| 28 | ENSG00000140939 | NOL3       | 27                                  | 1.74                  | 8.62E-03            |
| 29 | ENSG00000094804 | CDC6       | 44                                  | 1.73                  | 5.48E-04            |
| 30 | ENSG00000170074 | FAM153A    | 6                                   | 1.68                  | 2.06E-02            |
| 1  | ENSG00000185745 | IFIT1      | 57                                  | -2.67                 | 1.94E-07            |
| 2  | ENSG00000119917 | IFIT3      | 117                                 | -2.35                 | 4.04E-07            |
| 3  | ENSG00000137959 | IFI44L     | 256                                 | -2.14                 | 1.64E-05            |
| 4  | ENSG00000272398 | CD24       | 348                                 | -1.81                 | 1.21E-03            |
| 5  | ENSG00000132530 | XAF1       | 450                                 | -1.80                 | 1.37E-07            |
| 6  | ENSG00000120738 | EGR1       | 656                                 | -1.76                 | 4.11E-02            |
| 7  | ENSG00000137965 | IFI44      | 69                                  | -1.75                 | 2.37E-05            |
| 8  | ENSG00000141404 | GNAL       | 49                                  | -1.64                 | 4.55E-04            |

|    |                 |            |      |       |          |
|----|-----------------|------------|------|-------|----------|
| 9  | ENSG00000221963 | APOL6      | 633  | -1.63 | 2.20E-06 |
| 10 | ENSG00000143878 | RHOB       | 58   | -1.62 | 1.40E-05 |
| 11 | ENSG00000120129 | DUSP1      | 251  | -1.61 | 6.96E-04 |
| 12 | ENSG00000110848 | CD69       | 907  | -1.57 | 2.47E-02 |
| 13 | ENSG00000188613 | NANOS1     | 22   | -1.55 | 1.12E-02 |
| 14 | ENSG00000093072 | ADA2       | 373  | -1.50 | 4.58E-04 |
| 15 | ENSG00000137642 | SORL1      | 51   | -1.50 | 3.29E-03 |
| 16 | ENSG00000259529 | AL136295.5 | 36   | -1.46 | 1.10E-04 |
| 17 | ENSG00000070019 | GUCY2C     | 14   | -1.45 | 2.07E-02 |
| 18 | ENSG00000172602 | RND1       | 52   | -1.43 | 8.71E-03 |
| 19 | ENSG00000136158 | SPRY2      | 45   | -1.37 | 2.58E-03 |
| 20 | ENSG00000134215 | VAV3       | 98   | -1.31 | 8.83E-04 |
| 21 | ENSG00000198205 | ZXDA       | 43   | -1.28 | 8.16E-05 |
| 22 | ENSG00000242265 | PEG10      | 2061 | -1.25 | 3.44E-02 |
| 23 | ENSG00000110092 | CCND1      | 108  | -1.25 | 2.47E-03 |
| 24 | ENSG00000169252 | ADRB2      | 140  | -1.22 | 5.78E-03 |
| 25 | ENSG00000185507 | IRF7       | 227  | -1.19 | 1.19E-04 |
| 26 | ENSG00000157601 | MX1        | 978  | -1.18 | 1.48E-03 |
| 27 | ENSG00000187608 | ISG15      | 145  | -1.16 | 4.58E-05 |
| 28 | ENSG00000104324 | CPQ        | 114  | -1.12 | 3.59E-04 |
| 29 | ENSG00000138646 | HERC5      | 365  | -1.11 | 2.27E-04 |
| 30 | ENSG00000102524 | TNFSF13B   | 112  | -1.10 | 5.35E-03 |

\*30 most up-regulated genes (=positive fold-change) and down-regulated (= negative fold-change) in CLL cocultured on HS5-CD40L-IL4-IL21 cells with 2  $\mu$ M LY3009120.

**Supplemental Table 14:** List of top differentially expressed mRNAs in CLL cells co-cultured on HS5-CD40L-IL4-IL21 cells without vs. with 10  $\mu$ M naporafenib. Top 30 up-regulated and top 30 down-regulated mRNAs are included.

|    | GENE ID         | GENE NAME  | BASE MEAN [READS PER MILLION] | FOLD CHANGE [log2] | ADJUSTED P-VALUE |
|----|-----------------|------------|-------------------------------|--------------------|------------------|
| 1  | ENSG00000162433 | AK4        | 17                            | 4.00               | 1.32E-09         |
| 2  | ENSG00000105825 | TFPI2      | 130                           | 2.79               | 2.56E-10         |
| 3  | ENSG00000136010 | ALDH1L2    | 10                            | 2.68               | 2.45E-03         |
| 4  | ENSG00000100453 | GZMB       | 243                           | 2.65               | 2.04E-06         |
| 5  | ENSG00000143847 | PPFIA4     | 30                            | 2.61               | 2.80E-06         |
| 6  | ENSG00000169429 | CXCL8      | 90                            | 2.34               | 2.56E-06         |
| 7  | ENSG00000243440 | AF130351.1 | 23                            | 2.33               | 1.25E-04         |
| 8  | ENSG00000196611 | MMP1       | 58                            | 2.31               | 4.14E-05         |
| 9  | ENSG00000205129 | C4orf47    | 4                             | 2.21               | 3.07E-03         |
| 10 | ENSG00000177469 | CAVIN1     | 15                            | 2.11               | 1.39E-05         |
| 11 | ENSG00000123689 | GOS2       | 10                            | 2.07               | 1.16E-02         |
| 12 | ENSG00000112715 | VEGFA      | 70                            | 2.02               | 3.16E-07         |
| 13 | ENSG00000140939 | NOL3       | 27                            | 2.02               | 1.26E-03         |
| 14 | ENSG00000006453 | BAIAP2L1   | 23                            | 2.00               | 5.19E-04         |
| 15 | ENSG00000135842 | FAM129A    | 36                            | 1.97               | 4.59E-03         |
| 16 | ENSG00000108641 | B9D1       | 14                            | 1.95               | 1.28E-04         |
| 17 | ENSG00000154917 | RAB6B      | 7                             | 1.92               | 1.06E-02         |
| 18 | ENSG00000135643 | KCNMB4     | 17                            | 1.92               | 2.45E-03         |
| 19 | ENSG00000151012 | SLC7A11    | 5                             | 1.88               | 3.59E-02         |
| 20 | ENSG00000075618 | FSCN1      | 27                            | 1.86               | 1.74E-04         |
| 21 | ENSG00000027869 | SH2D2A     | 15                            | 1.84               | 9.50E-03         |
| 22 | ENSG00000168268 | NT5DC2     | 35                            | 1.83               | 2.03E-04         |
| 23 | ENSG00000139269 | INHBE      | 67                            | 1.82               | 9.15E-03         |
| 24 | ENSG00000073712 | FERMT2     | 8                             | 1.82               | 2.03E-02         |
| 25 | ENSG00000177181 | RIMKLA     | 10                            | 1.81               | 6.17E-03         |
| 26 | ENSG00000197632 | SERPINB2   | 25                            | 1.77               | 9.81E-04         |
| 27 | ENSG00000167861 | HID1       | 36                            | 1.77               | 5.26E-04         |
| 28 | ENSG00000127920 | GNG11      | 18                            | 1.74               | 4.88E-03         |
| 29 | ENSG00000114268 | PFKFB4     | 36                            | 1.73               | 1.26E-03         |
| 30 | ENSG00000163735 | CXCL5      | 40                            | 1.73               | 2.00E-03         |
| 1  | ENSG00000185745 | IFIT1      | 57                            | -3.34              | 1.08E-10         |
| 2  | ENSG00000119917 | IFIT3      | 117                           | -2.93              | 7.74E-11         |
| 3  | ENSG00000137959 | IFI44L     | 256                           | -2.56              | 1.72E-07         |
| 4  | ENSG00000132530 | XAF1       | 450                           | -2.28              | 4.17E-12         |
| 5  | ENSG00000137965 | IFI44      | 69                            | -2.01              | 2.84E-07         |
| 6  | ENSG00000143878 | RHOB       | 58                            | -1.96              | 2.31E-08         |
| 7  | ENSG00000120738 | EGR1       | 656                           | -1.96              | 0.00132124       |

|    |                 |            |      |       |             |
|----|-----------------|------------|------|-------|-------------|
| 8  | ENSG00000259529 | AL136295.5 | 36   | -1.95 | 2.03E-08    |
| 9  | ENSG00000203814 | HIST2H2BF  | 5    | -1.88 | 0.010858063 |
| 10 | ENSG00000198435 | NRARP      | 13   | -1.72 | 0.011456904 |
| 11 | ENSG00000187608 | ISG15      | 145  | -1.67 | 1.08E-10    |
| 12 | ENSG00000110848 | CD69       | 907  | -1.60 | 0.011686402 |
| 13 | ENSG00000157601 | MX1        | 978  | -1.56 | 1.05E-05    |
| 14 | ENSG00000138646 | HERC5      | 365  | -1.56 | 2.03E-08    |
| 15 | ENSG00000185507 | IRF7       | 227  | -1.48 | 5.06E-07    |
| 16 | ENSG00000127528 | KLF2       | 637  | -1.42 | 0.012918272 |
| 17 | ENSG00000184979 | USP18      | 9    | -1.39 | 0.038948129 |
| 18 | ENSG00000198205 | ZXDA       | 43   | -1.35 | 3.43E-05    |
| 19 | ENSG00000130589 | HELZ2      | 343  | -1.33 | 2.14E-05    |
| 20 | ENSG00000153234 | NR4A2      | 103  | -1.32 | 0.001513525 |
| 21 | ENSG00000145632 | PLK2       | 32   | -1.30 | 0.01856519  |
| 22 | ENSG00000172602 | RND1       | 52   | -1.27 | 0.033661349 |
| 23 | ENSG00000116741 | RGS2       | 2640 | -1.25 | 0.002096943 |
| 24 | ENSG00000126709 | IFI6       | 232  | -1.24 | 0.002672721 |
| 25 | ENSG00000120129 | DUSP1      | 251  | -1.23 | 0.012918272 |
| 26 | ENSG00000169047 | IRS1       | 77   | -1.23 | 0.000821794 |
| 27 | ENSG00000113263 | ITK        | 39   | -1.22 | 0.014163392 |
| 28 | ENSG00000144712 | CAND2      | 33   | -1.19 | 0.041808383 |
| 29 | ENSG00000093072 | ADA2       | 373  | -1.18 | 0.011817505 |
| 30 | ENSG00000055332 | EIF2AK2    | 644  | -1.17 | 4.17E-12    |

\*30 most up-regulated genes (=positive fold-change) and down-regulated (= negative fold-change) in CLL cocultured on HS5-CD40L-IL4-IL21 cells with 10  $\mu$ M naporafenib.

**Supplemental Table 15:** List of mice transplanted with the same CLL patients' sample alone or conditioned with two different supportive HS5 cell lines (HS5-CD40L-IL4 vs. HS5-CD40L-IL4-IL21).

| CONTROL MOUSE |                   |                      | MOUSE WITH HS5-CD40L-IL4 |                   |                      | MOUSE WITH HS5-CD40L-IL4-IL21 |                   |                      |
|---------------|-------------------|----------------------|--------------------------|-------------------|----------------------|-------------------------------|-------------------|----------------------|
| MOUSE CODE    | SPLEEN WEIGHT [g] | TIME TO DEATH [DAYS] | MOUSE CODE               | SPLEEN WEIGHT [g] | TIME TO DEATH [DAYS] | MOUSE CODE                    | SPLEEN WEIGHT [g] | TIME TO DEATH [DAYS] |
| M58           | 0.027             | 127                  | M61                      | 0.038             | 130                  | M62                           | 0.025             | 130                  |
| M63           | 0.03              | 103                  | M64                      | not analyzed      | 94                   | M65                           | 0.5               | 49                   |
| M66           | 0.02              | 96                   | M67                      | 0.035             | 96                   | M68                           | 0.088             | 36                   |
| M69           | 0.03              | 104                  | M70                      | 0.026             | 104                  | M71                           | 0.165             | 36                   |
| M72           | 0.027             | 167                  | M73                      | 0.055             | 167                  | M74                           | not analyzed      | 40                   |
| M76           | 0.03              | 166                  | M77                      | 0.552             | 166                  | M78                           | not analyzed      | 39                   |
| M81           | 0.025             | 206                  | M82                      | not analyzed      | 34                   | M83                           | 0.075             | 35                   |



**Supplemental Table 16: IGHV sequence of human cells in murine spleen in mice with developed lymphoma (compared to original patient's sequence).**

| CLL CODE | MOUSE CODE | CO-TRANSPLANTED HS5 CELL LINE | TUMOUR DEVELOPED IN MICE | IGHV from PATIENT'S CLL CELLS (human peripheral blood) |                     |         |      | TECHNICALLY SUCCESSFUL ANALYSIS OF IGHV FROM ENGRAFTMENT (DNA or cDNA) | IGHV from TUMOUR CELLS IN MURINE SPLEEN |              |                          |            |                                                      |              |                  |                                  |                                                                                         |
|----------|------------|-------------------------------|--------------------------|--------------------------------------------------------|---------------------|---------|------|------------------------------------------------------------------------|-----------------------------------------|--------------|--------------------------|------------|------------------------------------------------------|--------------|------------------|----------------------------------|-----------------------------------------------------------------------------------------|
|          |            |                               |                          | IGHV                                                   | HOMOLOGY [%]        | IGHD    | IGHJ |                                                                        | ANALYSIS FROM cDNA                      |              |                          |            | ANALYSIS FROM GENOMIC DNA                            |              |                  | COMMENT TO IGHV FROM ENGRAFTMENT |                                                                                         |
|          |            |                               |                          |                                                        |                     |         |      |                                                                        | IGHV                                    | HOMOLOGY [%] | IGHD                     | IGHJ       | IGHV                                                 | HOMOLOGY [%] | IGHD             |                                  | IGHJ                                                                                    |
| 056      | M11        | HS5-CD40L-IL4                 | yes                      | 3-11*01                                                | 100,00              | 3-9     | 6    | no                                                                     | not analyzed                            |              |                          |            | 5-51*01                                              | x            | x                | x                                |                                                                                         |
| 056      | M12        | HS5-CD40L-IL4                 | yes                      | 3-11*01                                                | 100,00              | 3-9     | 6    | yes                                                                    | not analyzed                            |              |                          |            | 5-51*01                                              | 92           | 5-12*01          | 6*02                             | (the same IGHV 5-51*01 and IGHJ also obtained from tumor mass sample)                   |
| 034      | M20        | HS5-CD40L-IL4                 | yes                      | 4-34*01                                                | 93,3                | 5-18*01 | 4*02 | yes                                                                    | not analyzed                            |              |                          |            | 4-34*01                                              | 93           | 5-18*01          | 4*02                             | clonally related (IGHV 4-34*01)                                                         |
| 034      | M22        | HS5-CD40L-IL4                 | yes                      | 4-34*01                                                | 93,3                | 5-18*01 | 4*02 | no                                                                     | no product                              |              |                          |            | no product                                           |              |                  |                                  |                                                                                         |
| 052      | M25        | HS5-CD40L-IL4                 | yes                      | 2-5*02                                                 | 93,5                | 1-7*01  | 4*02 | yes                                                                    | not analyzed                            |              |                          |            | 4-61*01                                              | 93,5         | 3-22*01          | 6*02                             |                                                                                         |
| 041      | M27        | HS5-CD40L-IL4                 | yes                      | 3-48*01                                                | 100,0               | 3-3*01  | 6*03 | yes                                                                    | 3-21*07                                 | 95,5         | 1-26*01                  | 5*02       | 3-21*01                                              | 95,1         | 26*01            | 5*02                             |                                                                                         |
| 039      | M29        | HS5-CD40L-IL4                 | yes                      | 3-23*01                                                | 89,6                | 6-6*01  | 4*02 | yes                                                                    | 3-23*01 or 3-23D*01                     | 89,6         | 6-6*01                   | 4*02       | no product                                           |              |                  | clonally related (IGHV 3-23*01)  |                                                                                         |
| 009      | M33        | HS5-CD40L-IL4                 | yes                      | 3-23*01                                                | 91,7                | 5-18*01 | 6*02 | no                                                                     | not analyzed                            |              |                          |            | no product                                           |              |                  |                                  |                                                                                         |
| 012      | M35        | HS5-CD40L-IL4                 | yes                      | 3-21*01                                                | 99,3                | x       | 6    | yes                                                                    | 3-74*01; 3-15*01                        | 95,5; 90,8   | 1-7*01; 3-16*01          | 5*02; 4*02 | no product                                           |              |                  |                                  |                                                                                         |
| 056      | M40        | HS5-CD40L-IL4                 | yes                      | 3-11*01                                                | 100,00              | 3-9     | 6    | no                                                                     | not analyzed                            |              |                          |            | no product                                           |              |                  |                                  |                                                                                         |
| 007      | M51        | HS5-CD40L-IL4                 | yes                      | 3-23*01 or 3-23D*01                                    | 100,0               | 3-10*01 | 4*02 | yes                                                                    | 4-39*01 or 4-39*02; 2-70*01 or 2-70*15  | 92,8; 95,9   | 3-10*03; 2-8*01, 6-13*01 | 4*02; 6*03 | 1-8*01; 3-33*01 or 3-33*06                           | 93,4; 99,7   | 3-10*01; x       | 6*02; 6*01 or 6*02 or 6*04       |                                                                                         |
| 022      | M64        | HS5-CD40L-IL4                 | yes                      | 3-7*01                                                 | 97,9                | 1-1*01  | 6*02 | no                                                                     | no product                              |              |                          |            | clonality not found                                  |              |                  |                                  |                                                                                         |
| 069      | M77        | HS5-CD40L-IL4                 | yes                      | 3-23*01                                                | 95,5                | 3-10*01 | 4*02 | no                                                                     | no product                              |              |                          |            | clonality not found                                  |              |                  |                                  |                                                                                         |
| 016      | M82        | HS5-CD40L-IL4                 | yes                      | 6-1*01; 4-34*01                                        | 100; 94,7; biclonal | 6-19*01 | 6*02 | no                                                                     | not analyzed                            |              |                          |            | no product                                           |              |                  |                                  |                                                                                         |
| 022      | M65        | HS5-CD40L-IL4-IL21            | yes                      | 3-7*01                                                 | 100,0               | 1-1*01  | 6*02 | yes                                                                    | 1-69*01 or 1-69D*01                     | 94,8         | 3-3*01                   | 3*02       | 1-69*01, 1-69D*01                                    | 94,8         | 3-3*01           | 3*02                             |                                                                                         |
| 015      | M68        | HS5-CD40L-IL4-IL21            | yes                      | 3-30*02 or 3-30-5*02                                   | 92,4                | 5-18*01 | 4*02 | yes                                                                    | 3-23*01 or 3-23D*01                     | 89,2         | 3-10*01                  | 6*03       | 3-30*03 or 3-30*18 or 3-30-5*01; 3-23*01 or 3-23D*01 | 95,1; 89,2   | 5-18*01; 3-10*01 | 4*02; 6*03                       | clonally related (IGHV 3-30*02 or 3-30-5*02); two clones detected in mouse spleen (DNA) |

|     |      |                               |     |                     |                 |         |      |     |                                         |                  |                          |                         |              |         |         |      |                                                                                         |
|-----|------|-------------------------------|-----|---------------------|-----------------|---------|------|-----|-----------------------------------------|------------------|--------------------------|-------------------------|--------------|---------|---------|------|-----------------------------------------------------------------------------------------|
| 020 | M71  | HS5-CD40L-IL4-IL21            | yes | 3-23*01 or 3-23D*01 | 100,0           | 2-21*02 | 3*02 | yes | 3-23*01 or 3-23D*01; 1-18*01 or 1-18*04 | 86.1; 100.0      | 2-15*01, 3-9*01; 2-21*02 | 4*02; 3*02              | 1-18*01      | 86,4    | 3-9*01  | 4*02 | clonally related (IGHV 3-23*01 or 3-23D*01); two clones detected in mouse spleen (cDNA) |
| 030 | M74  | HS5-CD40L-IL4-IL21            | yes | 3-23*01 or 3-23D*01 | 96,5            | 3-10*01 | 3*02 | no  | not analyzed                            |                  |                          | not analyzed            |              |         |         |      |                                                                                         |
| 069 | M78  | HS5-CD40L-IL4-IL21            | yes | 3-23*01             | 95,5            | 3-10*01 | 4*02 | no  | not analyzed                            |                  |                          | not analyzed            |              |         |         |      |                                                                                         |
| 016 | M83  | HS5-CD40L-IL4-IL21            | yes | 6-1*01              | 100,0, biclonal | 6-19*01 | 6*03 | yes | no product                              |                  |                          | 3-13*01                 | 94,74        | 3-22*01 | 6*02    |      |                                                                                         |
| 028 | M98  | HS5-CD40L-IL4-IL21            | yes | 3-72*01             | 91,5            | 3-10*01 | 4*02 | yes | 2-26*01; 3-30*03; 4-39*02               | 92.1; 91.7; 92.8 | 6-6*01; 4-23*01; 6-19*01 | 5*02; 6*02; 4*02        | not analyzed |         |         |      |                                                                                         |
| 079 | M101 | HS5-CD40L-IL4-IL21            | yes | 1-18*01             | 100,0           | 6-19*01 | 4*02 | no  | no product                              |                  |                          | not analyzed            |              |         |         |      |                                                                                         |
| 087 | M107 | HS5-CD40L-IL4-IL21            | yes | 3-21*01             | 100,0           | 4-11*0  | 3*02 | yes | 3-7*01; 3-74*01 or 3-74*03; 4-59*01     | 97.6; 96.9; 96.8 | 2-15*01; 1-1*01; 5-18*1  | 4*02; 6*03; 6*02        | not analyzed |         |         |      |                                                                                         |
| 056 | M10  | NONE - CONTROL TO MICE M5, M6 | yes | 3-11*01             | 100,00          | 3-9     | 6    | no  | not analyzed                            |                  |                          | 5-51*01; weakly 3-11*01 | x            | x       | x       |      |                                                                                         |
| 039 | M28  | NONE - CONTROL TO MOUSE M29   | yes | 3-23*01             | 89,6            | 6-6*01  | 4*02 | yes | 3-7*01                                  | 89,2             | 3-16*02                  | 4*02                    | 3-7*01       | 89,2    | 3-16*02 | 4*02 |                                                                                         |

**Supplemental Table 17:** FISH analysis of 13q14 deletion in tumor cells (cells engrafting in murine spleen).

| MOUSE CODE | HS5 CELL LINE co-transplanted | PATIENT'S CHROMOSOMAL ABERATIONS (at sampling)                                     | TUMOUR CELLS IN MURINE SPLEEN* |
|------------|-------------------------------|------------------------------------------------------------------------------------|--------------------------------|
| M20        | HS5-CD40L-IL4                 | 50 % cells with monoalelic <b>deletion 13q14</b>                                   | <b>13q14 deletion detected</b> |
| M25        | HS5-CD40L-IL4                 | 13 % cells with monoalelic deletion, 68 % cells with bialelic deletion 13q14       | 13q14 deletion not found       |
| M27        | HS5-CD40L-IL4                 | 55 % cells with monoalelic deletion 13q14                                          | 13q14 deletion not found       |
| M29        | HS5-CD40L-IL4                 | 89 % cells with monoalelic <b>deletion 13q14</b>                                   | <b>13q14 deletion detected</b> |
| M35        | HS5-CD40L-IL4                 | 28 % cells with monoalelic deletion 13q14, 66 % cells with bialelic deletion 13q14 | 13q14 deletion not found       |
| M77        | HS5-CD40L-IL4                 | 89 % cells with monoalelic deletion 13q14                                          | 13q14 deletion not found       |
| M65        | HS5-CD40L-IL4-IL21            | 88 % cells with bialelic deletion 13q14                                            | 13q14 deletion not found       |
| M83        | HS5-CD40L-IL4-IL21            | 13q14 deletion                                                                     | 13q14 deletion not found       |
| M101       | HS5-CD40L-IL4-IL21            | 74 % cells with trisomy CEP12                                                      | 13q14 deletion not found       |
| M107       | HS5-CD40L-IL4-IL21            | 91 % cells with monoalelic deletion 13q14                                          | 13q14 deletion not found       |

**Supplemental Table 18:** Primer sequences.

| GENE         | FORWARD                    | REVERSE                    |
|--------------|----------------------------|----------------------------|
| <i>EBNA1</i> | 5'-TACAGGACCTGGAAATGGCC-3' | 5'-TCTTTGAGGTCCACTGCCG-3'  |
| <i>IL4</i>   | 5'-CATGGGACTGACCTCACAGC-3' | 5'-TCTTGCTAGCGGCGAAGATG-3' |

## References

- [1] V. Seda, E. Vojackova, L. Ondrisova, L. Kostalova, S. Sharma, T. Loja, G. Mladonicka Pavlasova, D. Zicha, M. Kudlickova Peskova, J. Krivanek, K. Liskova, L. Kren, V. Benes, K. Musilova Litzmanova, M. Borsky, J. Oppelt, J. Verner, S. Pospisilova, Y. Brychtova, A. Panovska, Z. Tan, S. Zhang, M. Doubek, K. Amruz Cerna, J. Mayer, M. Mraz, FoxO1-GAB1 axis regulates homing capacity and tonic AKT activity in chronic lymphocytic leukemia, *Blood* 138 (2021) 758–772. <https://doi.org/10.1182/blood.2020008101>.
- [2] M. Mraz, K. Malinova, J. Mayer, S. Pospisilova, MicroRNA isolation and stability in stored RNA samples, *Biochem Biophys Res Commun* 390 (2009) 1–4. <https://doi.org/10.1016/j.bbrc.2009.09.061>.
- [3] A. Krämer, J. Green, J. Pollard, S. Tugendreich, Causal analysis approaches in Ingenuity Pathway Analysis, *Bioinformatics* 30 (2014) 523–530. <https://doi.org/10.1093/bioinformatics/btt703>.
- [4] Y. Herishanu, P. Pérez-Galán, D. Liu, A. Biancotto, S. Pittaluga, B. Vire, F. Gibellini, N. Njuguna, E. Lee, L. Stennett, N. Raghavachari, P. Liu, J.P. McCoy, M. Raffeld, M. Stetler-Stevenson, C. Yuan, R. Sherry, D.C. Arthur, I. Maric, T. White, G.E. Marti, P. Munson, W.H. Wilson, A. Wiestner, The lymph node microenvironment promotes B-cell receptor signaling, NF-kappaB activation, and tumor proliferation in chronic lymphocytic leukemia, *Blood* 117 (2011) 563–574. <https://doi.org/10.1182/blood-2010-05-284984>.
- [5] B.J.C. Quah, H.S. Warren, C.R. Parish, Monitoring lymphocyte proliferation in vitro and in vivo with the intracellular fluorescent dye carboxyfluorescein diacetate succinimidyl ester, *Nat Protoc* 2 (2007) 2049–2056. <https://doi.org/10.1038/nprot.2007.296>.
- [6] J.J.M. van Dongen, A.W. Langerak, M. Brüggemann, P. a. S. Evans, M. Hummel, F.L. Lavender, E. Delabesse, F. Davi, E. Schuurin, R. García-Sanz, J.H.J.M. van Krieken, J. Droese, D. González, C. Bastard, H.E. White, M. Spaargaren, M. González, A. Parreira, J.L. Smith, G.J. Morgan, M. Kneba, E.A. Macintyre, Design and standardization of PCR primers and protocols for detection of clonal immunoglobulin and T-cell receptor gene recombinations in suspect lymphoproliferations: Report of the BIOMED-2 Concerted Action BMH4-CT98-3936, *Leukemia* 17 (2003) 2257–2317. <https://doi.org/10.1038/sj.leu.2403202>.
- [7] C. Sun, Y.-C. Chen, A.Z. Martinez, M.J. Baptista, S. Pittaluga, D. Liu, D. Rosebrock, S.H. Gohil, N.S. Saba, T. Davies-Hill, S.E.M. Herman, G. Getz, M. Pirooznia, C.J. Wu, A. Wiestner, The Immune Microenvironment Shapes Transcriptional and Genetic Heterogeneity in Chronic Lymphocytic Leukemia, *Blood Advances* (2022) bloodadvances.2021006941. <https://doi.org/10.1182/bloodadvances.2021006941>.
- [8] M.F. Pascutti, M. Jak, J.M. Tromp, I.A.M. Derks, E.B.M. Remmerswaal, R. Thijssen, M.H.A. van Attekum, G.G. van Bochove, D.M. Luijks, S.T. Pals, R.A.W. van Lier, A.P. Kater, M.H.J. van Oers, E. Eldering, IL-21 and CD40L signals from autologous T cells can induce antigen-independent proliferation of CLL cells, *Blood* 122 (2013) 3010–3019. <https://doi.org/10.1182/blood-2012-11-467670>.
